# Supplementary material for: Anti-CAIX BBζ CAR4/8 T cells exhibit superior efficacy in a ccRCC mouse model
Source: PubMed Central journal article supplement — Mol Ther Oncolytics. 2021 Dec 31;24:385–99. doi: 10.1016/j.omto.2021.12.019 (PMC8792103; doi:10.1016/j.omto.2021.12.019), 2021-12-31
Supplement: mmc1.pdf [file mmc1.pdf]

**Supplemental information**

**Anti-CAIX BB $\zeta$  CAR4/8 T cells exhibit  
superior efficacy in a ccRCC mouse model**

**Yufei Wang, Alicia Buck, Marion Grimaud, Aedin C. Culhane, Sreekumar Kodangattil, Cecile Razimbaud, Dennis M. Bonal, Quang-De Nguyen, Zhu Zhu, Kevin Wei, Madison L. O'Donnell, Ying Huang, Sabina Signoretti, Toni K. Choueiri, Gordon J. Freeman, Quan Zhu, and Wayne A. Marasco**

## Supplementary Materials

### Supplemental Figures

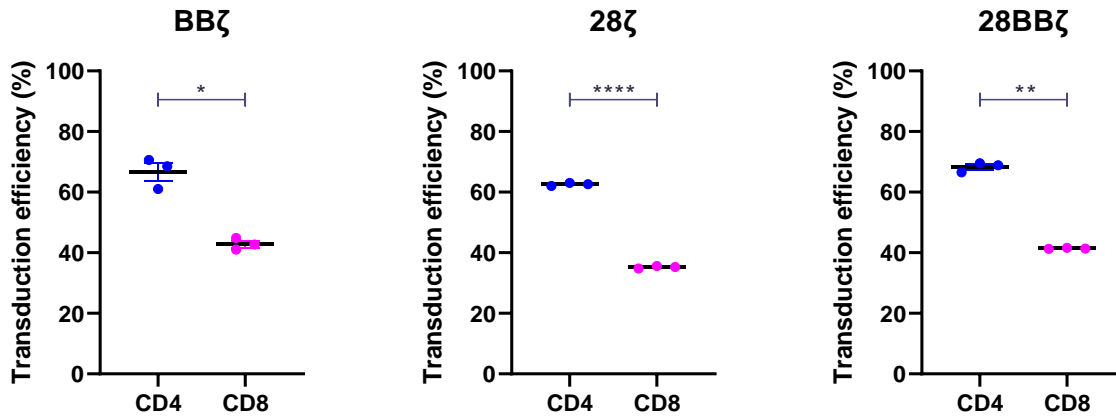

**Supplementary Figure 1. Transduction efficiency of CAR-T.** Transduction efficiency of CD4 (blue) and CD8 (pink) anti-CAIX BBζ, 28ζ, and 28BBζ CAR-T cells. ZsGreen expressing cells were quantified via flow cytometry and ZsGreen positivity was used to calculate transduction efficiency. *P* values are defined by unpaired two-tailed t-tests (\**p* < 0.05; \*\**p* < 0.01; \*\*\**p* < 0.001; and \*\*\*\**p* < 0.0001).

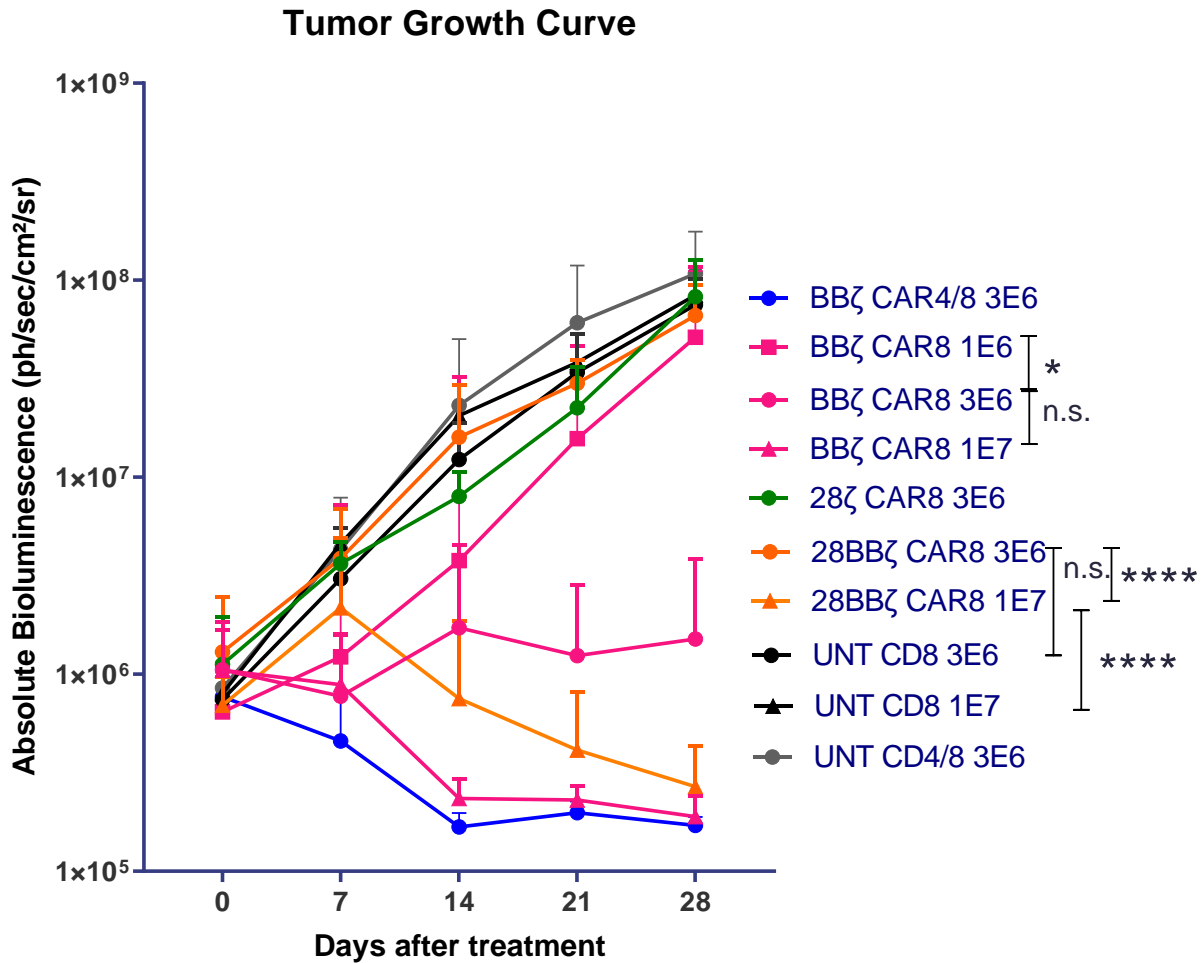

**Supplementary Figure 2. Tumor growth curve of mice treated with 1 million cells of anti-CAIX BBζ CAR8, 3 million cells of BBζ CAR8, 28ζ CAR8, 28BBζ CAR8, BBζ CAR4/8, UNT CD8 and CD4/8 cells, 10 million cells of BBζ CAR8, 28BBζ CAR8, and UNT CD8. BLI was performed on Day 0, 7, 14, 21 and 28 after CAR-T infusion. *P* values are defined by ANOVA (\**p* < 0.05; \*\**p* < 0.01; \*\*\**p* < 0.001; and \*\*\*\**p* < 0.0001).**

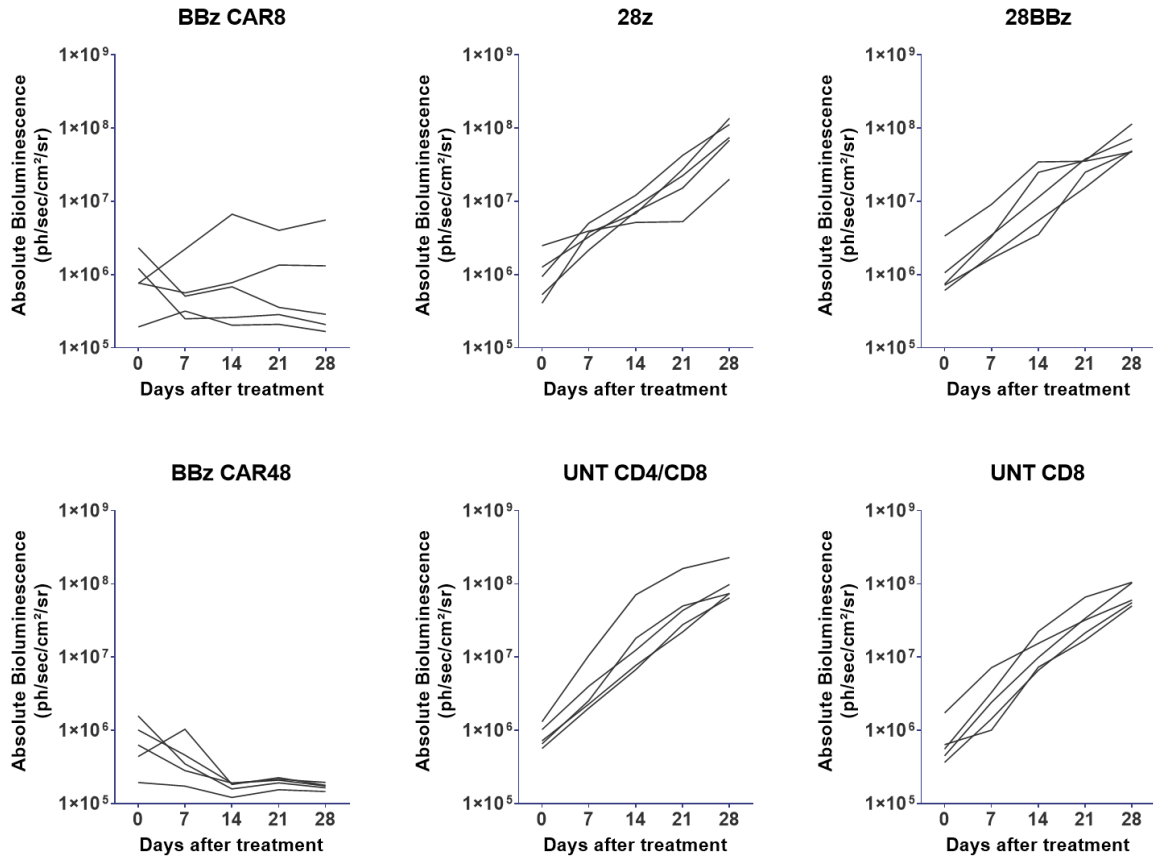

**Supplementary Figure 3. Tumor growth curve of each individual mouse treated with anti-CAIX BBζ, 28ζ, 28BBζ, BBζ CAR4/8, CD8 and CD48 UNT cells. BLI was performed on Day 0, 7, 14, 21 and 28 after CAR-T infusion.**

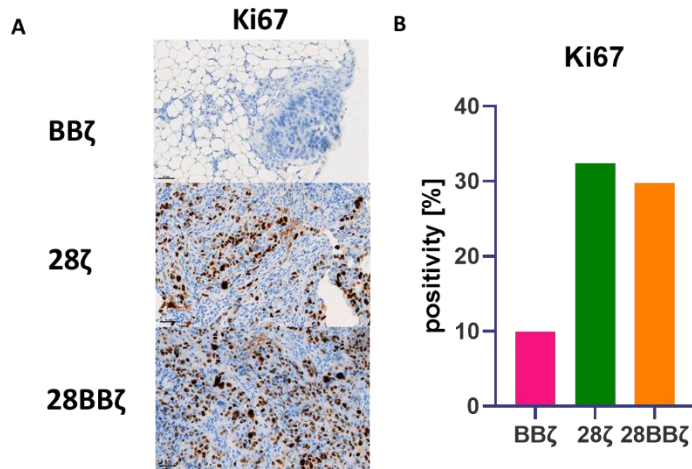

**Supplementary Figure 4. IHC analysis of tumors treated with CAR-T cells.** (A) Images of Ki67 staining on tumors treated with BBζ CAR8, 28ζ CAR8 and 28BBζ CAR8 cells (50x). (B) Quantification of Ki67+ tumor cells in tumors treated with BBζ CAR8 (pink), 28ζ CAR8 (green) and 28BBζ CAR8 (orange) cells.

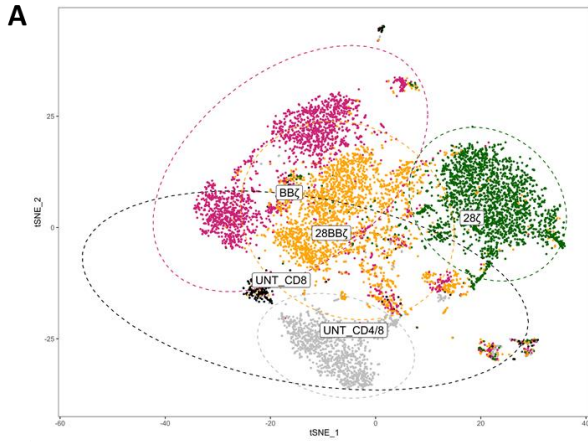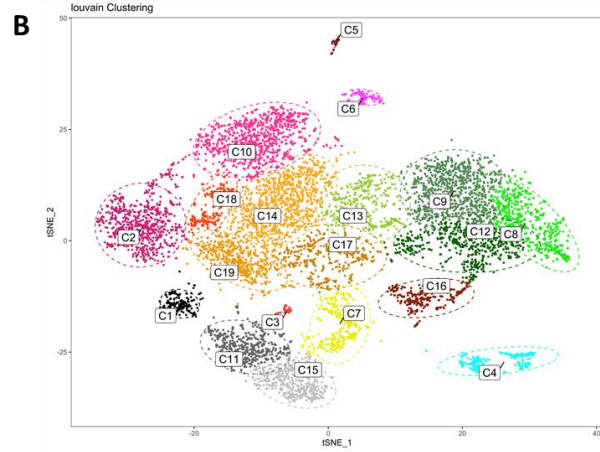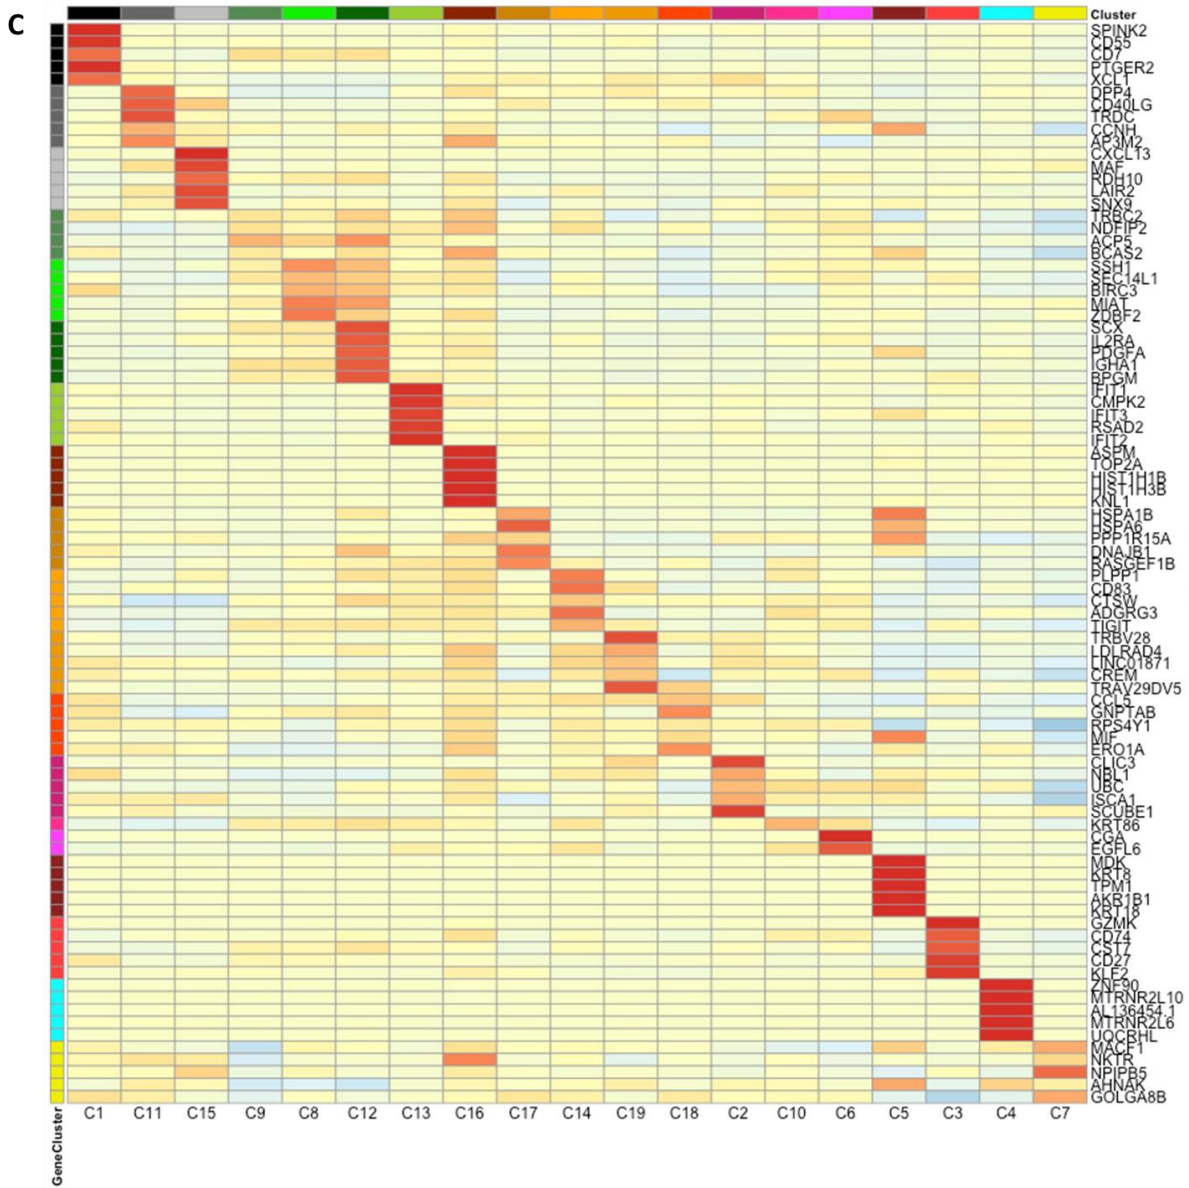

**Supplementary Figure 5. Transcriptional signatures of tumor infiltrating T cells.** (A) tSNE plot of tumor infiltrating T cells, colored by hashtag/ treatment group. This is same as Figure 4A and is shown here to have a better version when compare with panel B. (B) tSNE plot of tumor infiltrating T cells, colored by cluster assigned by Louvain clustering. 19 clusters were observed. (C) Top 5 differential expression genes ranked by *P* value from each cluster. The color bars on the top and side here reflect the color in the t-SNE plot.

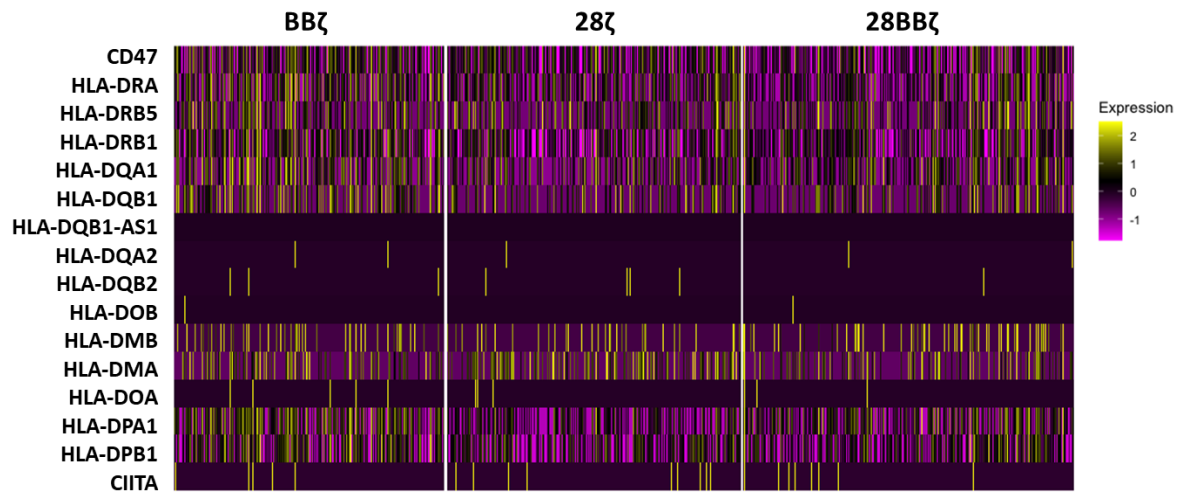

**Supplementary Figure 6. Heatmap of MHC II genes in BBζ CAR8, 28ζ CAR8, 28BB CAR8.**

Sixteen MHC II genes, CD74, HLA-DRA, HLA-DRB5, HLA-DRB1, HLA-DQA1, HLA-DQB1, HLA-DQB1-AS1, HLA-DQA2, HLA-DQB2, HLA-DOB, HLA-DMB, HLA-DMA, HLA-DOA, HLA-DPA1, HLA-DPB1, and CIITA were shown in the heatmap. Seven low expression genes HLA-DQB1-AS1, HLA-DQA2, HLA-DQB2, HLA-DOB, HLA-DMB, HLA-DOA, CIITA were removed in **Figure 5. C and D.**



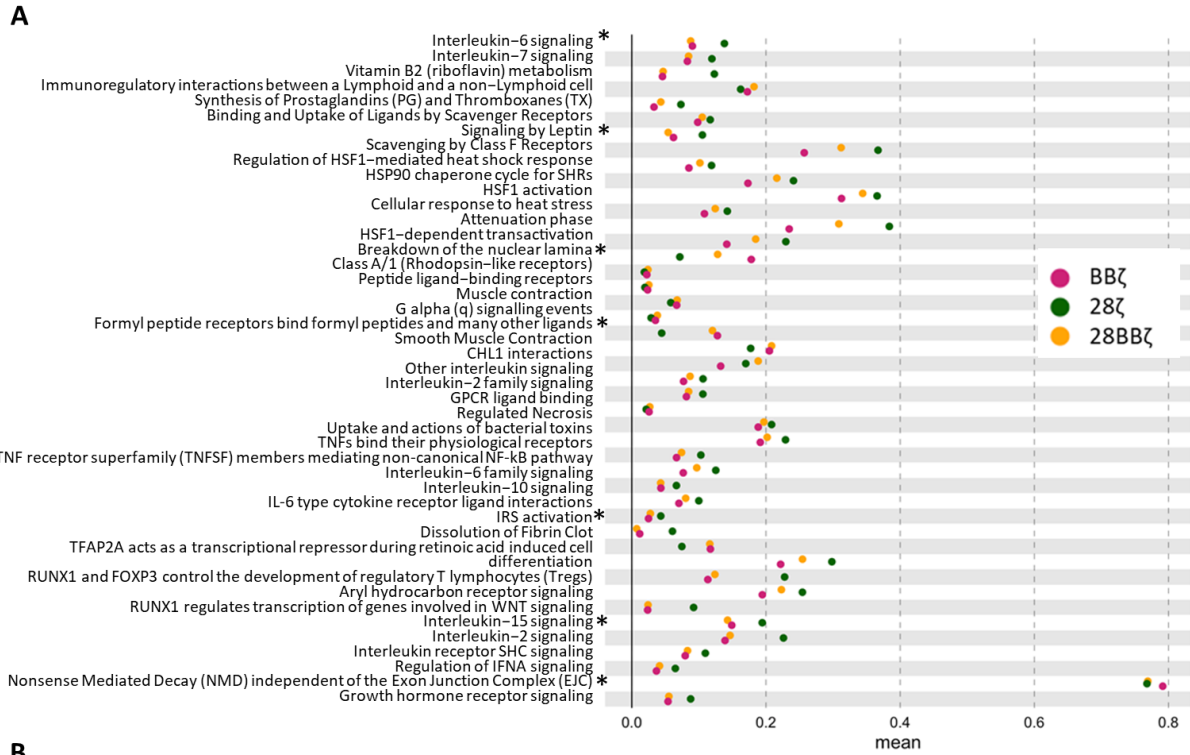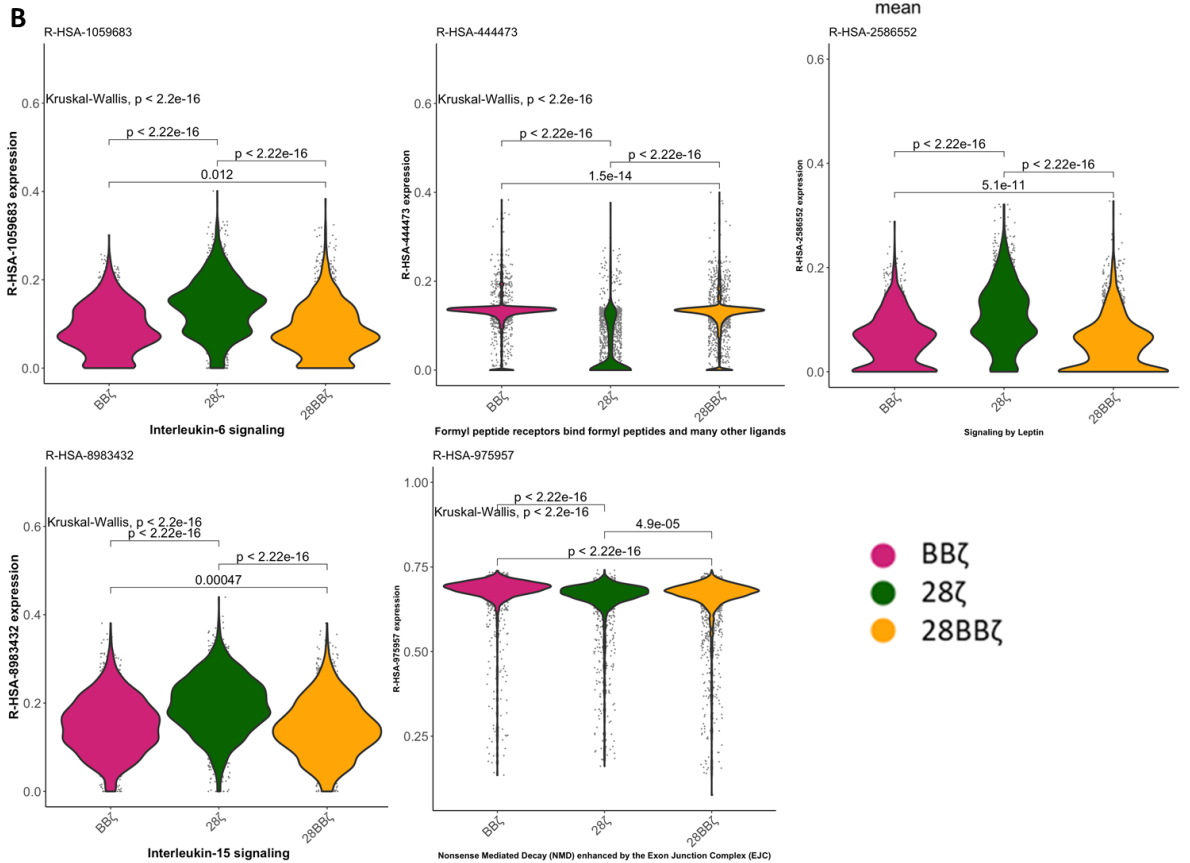

**Supplementary Figure 7. Pathway analysis of tumor infiltrating BB $\zeta$ , 28 $\zeta$ , and 28BB $\zeta$  CAR-T cells. (A) 44 pathways ranked by Reactome ID. See Table S4 for all *P* value results and Table S5 for all FDR results. 44 pathways were selected using *P* value <0.001 and PairwiseWilcox statistic >0.7 in each pairwise comparison. AUC values of BB $\zeta$  CAR8 (pink), 28 $\zeta$  CAR8 (green), 28BB $\zeta$  CAR8 (orange) in each pathway were shown in the plot. In seven pathways labeled with \*, the AUC value of BB $\zeta$  has a significant difference ( $p < 0.05$ ) compared to the value of 28BB $\zeta$ .**

**(B) Five pathways with significant difference in comparison of BB $\zeta$  and 28BB $\zeta$ .** AUC values of BB $\zeta$  CAR8 (pink), 28 $\zeta$  CAR8 (green), 28BB $\zeta$  CAR8 (orange) in each pathway (Interleukin-6 signaling, Formyl peptide receptors bind formyl peptides and many other ligands, Signaling by Leptin, Interleukin-15 signaling, and Nonsense Mediated Decay (NMD) independent of the Exon Junction Complex (EJC)) and corresponding *P* values of each pair comparison were shown in the plot.

### **Supplemental Tables**

See Excel files online for full Supplemental Tables.
