# Supplementary material for: Anti-CAIX BBζ CAR4/8 T cells exhibit superior efficacy in a ccRCC mouse model
Source: PubMed Central journal article supplement — Mol Ther Oncolytics. 2021 Dec 31;24:385–99. doi: 10.1016/j.omto.2021.12.019 (PMC8792103; doi:10.1016/j.omto.2021.12.019), 2021-12-31
Supplement: mmc3.pdf [file mmc3.pdf]

# Anti-CAIX BB $\zeta$ CAR4/8 T cells exhibit superior efficacy in a ccRCC mouse model

Yufei Wang,<sup>1,2</sup> Alicia Buck,<sup>1</sup> Marion Grimaud,<sup>1</sup> Aedin C. Culhane,<sup>3,4,5</sup> Sreekumar Kodangattil,<sup>1</sup> Cecile Razimbaud,<sup>1</sup> Dennis M. Bonal,<sup>6</sup> Quang-De Nguyen,<sup>6</sup> Zhu Zhu,<sup>2,7</sup> Kevin Wei,<sup>2,7</sup> Madison L. O'Donnell,<sup>8</sup> Ying Huang,<sup>8</sup> Sabina Signoretti,<sup>2,8,9</sup> Toni K. Choueiri,<sup>2,10</sup> Gordon J. Freeman,<sup>2,10</sup> Quan Zhu,<sup>1,2</sup> and Wayne A. Marasco<sup>1,2</sup>

<sup>1</sup>Department of Cancer Immunology and Virology, Dana-Farber Cancer Institute, Boston, MA 02215, USA; <sup>2</sup>Harvard Medical School, Boston, MA 02115, USA; <sup>3</sup>Department of Data Science, Dana-Farber Cancer Institute, Boston, MA 02215, USA; <sup>4</sup>Department of Biostatistics, Harvard TH Chan School of Public Health, Boston, MA 02115, USA; <sup>5</sup>Limerick Digital Cancer Research Center, Health Research Institute, School of Medicine, University of Limerick, Limerick V94 T9PX, Ireland; <sup>6</sup>Lurie Family Imaging Center, Center for Biomedical Imaging in Oncology, Dana-Farber Cancer Institute, Boston, MA 02215, USA; <sup>7</sup>Division of Rheumatology, Inflammation and Immunity, Brigham and Women's Hospital, Boston, MA 02115, USA; <sup>8</sup>Department of Oncologic Pathology, Dana-Farber Cancer Institute, Boston, MA 02215, USA; <sup>9</sup>Department of Pathology, Brigham and Women's Hospital, Boston, MA 02115, USA; <sup>10</sup>Department of Medical Oncology, Dana-Farber Cancer Institute, Boston, MA 02215, USA

**Improving CAR-T cell therapy for solid tumors requires a better understanding of CAR design and cellular composition. Here, we compared second-generation (BB $\zeta$  and 28 $\zeta$ ) with third-generation (28BB $\zeta$ ) carbonic anhydrase IX (CAIX)-targeted CAR constructs and investigated the antitumor effect of CAR-T cells with different CD4/CD8 proportions *in vitro* and *in vivo*. The results demonstrated that BB $\zeta$  exhibited superior efficacy compared with 28 $\zeta$  and 28BB $\zeta$  CAR-T cells in a clear-cell renal cell carcinoma (ccRCC) skrc-59 cell bearing NSG-SGM3 mouse model. The mice treated with a single dose of BB $\zeta$  CD4/CD8 mixture (CAR4/8) showed complete tumor remission and remained tumor-free 72 days after CAR-T cells infusion. In the other CAR-T and control groups, tumor-infiltrating T cells were recovered and profiled. We found that BB $\zeta$  CAR8 cells upregulated expression of major histocompatibility complex (MHC) class II and cytotoxicity-associated genes, while downregulating inhibitory immune checkpoint receptor genes and diminishing differentiation of regulatory T cells (Treg cells), leading to excellent therapeutic efficacy *in vivo*. Increased memory phenotype, elevated tumor infiltration, and decreased exhaustion genes were observed in the CD4/8 untransduced T (UNT) cells compared with CD8 alone, indicating that CD4/8 would be the favored cellular composition for CAR-T cell therapy with long-term persistence. In summary, these findings support that BB $\zeta$  CAR4/8 cells are a highly potent, clinically translatable cell therapy for ccRCC.**

## INTRODUCTION

CAR-T cells are a new type of “living drug,” in which the CAR contains a single-chain variable antibody fragment (scFv) linked to an intracellular signaling block that includes the CD3 $\zeta$  activation domain (first generation), CD3 $\zeta$  with CD28 or 4-1BB (second generation), or CD3 $\zeta$  with both costimulatory domains (third generation).<sup>1</sup> CAR-T cells have proven to be a powerful, clinically translatable

immunotherapy for hematologic malignancies.<sup>2–4</sup> Based on the promising clinical trial data, in 2017, the US Food and Drug Administration (FDA) approved the first CAR-T cell therapy, tisagenlecleucel (Kymriah), for treatment of certain children and young adults with a form of acute lymphoblastic leukemia (ALL)<sup>5,6</sup> and the second CAR-T cell therapy, axicabtagene ciloleucel (Yescarta), for patients with large-B-cell lymphomas who had received at least two prior treatment regimens.<sup>7,8</sup> So far, there are five CAR-T products approved by the FDA, four CD19-targeted CAR-T cells<sup>9,10</sup> and one targeting B-cell maturation antigen (BCMA).<sup>11</sup>

The focus of CAR designs has shifted to incorporation of intracellular signaling domains from T cell costimulatory molecules to overcome problems with inefficient effector function and anergic status of anti-tumor CAR-T cells. The most frequently used domains are derived from the CD28 family (CD28 and ICOS) or the tumor necrosis factor receptor (TNFR) family (4-1BB, CD27, and OX40).<sup>12</sup> Incorporation of CD28-signaling domain into CARs generates CAR-T cells with superior antitumor activities, including tumor-induced proliferation, cytotoxicity, cytokine secretion, clonal expansion, and tumor regression. CAR-T cells that utilize the 4-1BB signaling domain have slower onset of antitumor activity but have the advantage of providing durable activity *in vivo* due to resistance of anergy induction.<sup>13,14</sup> In recent clinical trials, CD28-encoded CARs targeting CD19 have shown promising results in chronic lymphocytic leukemia (CLL), indolent B-cell lymphoma, and ALL.<sup>3,15</sup> Similarly, complete remission and long-term survival of effector memory T cells have been observed in patients with advanced chemotherapy-resistant CLL who had received adoptive immunotherapy using the 4-1BB CAR targeting

Received 1 December 2021; accepted 28 December 2021;  
<https://doi.org/10.1016/j.omto.2021.12.019>

**Correspondence:** Wayne A. Marasco, Department of Cancer Immunology and Virology, Dana-Farber Cancer Institute, Boston, MA 02215, USA.

**E-mail:** [wayne\\_marasco@dfci.harvard.edu](mailto:wayne_marasco@dfci.harvard.edu)

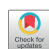

CD19, illustrating successful translation of such a therapeutic approach.<sup>16</sup>

Wang et al.<sup>17</sup> reported that CD4 CAR-T cells were considered to be a highly potent and clinically important T cell subset for effective CAR therapy, which was validated in their orthotopic glioblastoma (GBM) mouse model by using GBM-associated antigen interleukin-13 receptor  $\alpha 2$  (IL-13Ra2)-targeted CAR-T cells with different compositions of CD4 and CD8 subsets. The Fry team has shown that CD4 CAR-T cells alone can be cytolytic and equally potent as CD8 CAR-T cells at eradicating leukemia *in vivo* and may be superior due to better persistence and reduced susceptibility toward exhaustion, thereby preventing relapse.<sup>18</sup>

The results from the Riddell and Maloney teams suggested that infusion of CD8 CAR-T cells combined with CD4 CAR-T cells might provide optimal antitumor efficacy.<sup>19,20</sup> Sheih et al.<sup>21</sup> studied clonal kinetics and transcriptional programs that regulate the fate of anti-CD19 CD8 CAR-T cells isolated from the infusion product and from blood of patients treated with CD19-targeted CAR-T cell immunotherapy via T cell receptor  $\beta$  (TCRB) sequencing, integration site analysis, and single-cell RNA sequencing (scRNA-seq). The results demonstrated that expanded clones after infusion mainly originate from infused clusters with higher expression of cytotoxicity and proliferation genes.

Long et al.<sup>22</sup> and Boroughs et al.<sup>23</sup> performed transcriptional analysis on *ex vivo* cultured CD19-targeted CAR-T cells with different costimulatory domains via transcriptome sequencing, which revealed the transcriptional signatures of CARs resulting from different costimulatory domains. However, the transcriptome of solid-tumor-infiltrating CAR-T cells has not been well studied but may uncover novel correlations between functional activity and transcriptional signatures of CAR-T cells. Here, we evaluated the killing capacity of BB $\zeta$ , 28 $\zeta$ , and 28BB $\zeta$  CAIX-targeted CAR-T cells with different cellular composition in a ccRCC orthotopic NSG-SGM3 mouse model. Our results showed that anti-CAIX BB $\zeta$  CAR-T cells with a CD4/CD8 ratio of 2:1, CAR4/8, resulted in complete tumor regression and maintained immune surveillance. For other CAR-T and control groups, profiling transcriptional signatures of tumor-infiltrating CAR-T cells revealed that 4-1BB signaling led to elevated expression of pro-inflammatory genes and downregulated expression of negative immune modulator genes, as well as less differentiation of BB $\zeta$  CAR8 into CD25<sup>+</sup>FOXP3<sup>+</sup> CD8 Treg cells.

## RESULTS

### Generation of anti-CAIX second-generation and third-generation CAR-T cells

Previously, we constructed a first-generation CD3 $\zeta$ <sup>24</sup> and a second-generation 28 $\zeta$  CAR<sup>25</sup> targeting CAIX. CAIX is highly expressed in ccRCC and hence used as a therapeutic target for patients with ccRCC.<sup>26,27</sup> To enhance the therapeutic effect of anti-CAIX CAR-T cells and translate the cellular therapy to solid tumor treatment, we built a second-generation CAR with an anti-CAIX G36 scFv followed

by a 4-1BB costimulatory domain and CD3 $\zeta$  activation signal (BB $\zeta$ ) and a third-generation CAR G36-CD28-4-1BB (28BB $\zeta$ ) with both CD28 and 4-1BB modules. All of these CAR constructs have an IRES domain after the CAR moiety to express the ZsGreen fluorophore. We excluded the first-generation CARs because of their well-known poor persistence *in vivo* and compared two second-generation (28 $\zeta$  and BB $\zeta$ ) CARs with the third-generation CAR (28BB $\zeta$ ) *in vivo* (Figure 1A). CD4 and CD8 T cells were isolated from healthy-donor peripheral blood mononuclear cells (PBMCs) and transduced separately using the same multiplicity of infection (MOI). CAR-T cells were purified by flow sorting for *in vitro* and *in vivo* evaluation.

### Assessment of anti-CAIX BB $\zeta$ with different CD4/8 ratios *in vitro*

We utilized anti-CAIX G36 BB $\zeta$  CAR-T cells to optimize the CD4:CD8 cellular ratio to be used in the *in vivo* experiment. We observed that CD4 T cells in general had a higher transduction efficiency compared with CD8 T cells among three CAR constructs, 28 $\zeta$ , BB $\zeta$ , and 28BB $\zeta$  (Figure S1). The antitumor efficacy of BB $\zeta$  CAR-T cells with pure CD4, CD4:CD8 ratio of 2:1, CD4:CD8 ratio of 1:1, CD4:CD8 ratio of 1:2, and pure CD8, was evaluated using image cytometry on mCardinal-expressing CAIX<sup>+</sup> ccRCC patient-derived cell line skrc-59 as described previously.<sup>28,29</sup>

With effector to target cell (E:T) ratio of 2:1, CD8-only CAR-T cells exhibited the strongest killing capacity and pure CD4 CAR-T cells showed modest cytotoxicity in a 48 h *in vitro* co-incubation (Figure 1B). With increasing proportions of CD8 in the CD4/8 CAR-T cell mixture, killing of CAIX<sup>+</sup> skrc-59 cells was significantly elevated, demonstrating the positive correlation of the CD8 proportion in the CAR-T cell mixture with CAR-T cytotoxicity. We analyzed the pattern of cytokine release at 48 h via Luminex (Figure 1C). A greater than 8-fold change in the BB $\zeta$  CAR-T cell cultures compared with the untransduced T cells (UNT) was seen for IL-2, granulocyte-macrophage colony-stimulating factor (GM-CSF), interferon  $\gamma$  (IFN- $\gamma$ ), TNF, and MIP-1a, while lesser fold changes were seen with other cytokines. We also demonstrated that the CD4 CAR-T cells exhibited higher levels of cytokine release compared with CD8, and cytokine release was positively correlated with the proportion of CD4. To balance cytolytic CD8 T cell killing and cytokine-induced killing, CD8 only (CAR8) and a CD4:CD8 ratio of 2:1 (CAR4/8) BB $\zeta$  CAR-T cells were selected to be evaluated *in vivo*.

### Anti-CAIX BB $\zeta$ CAR8 and CAR4/8 showed superior efficacy in ccRCC orthotopic mouse model

An orthotopic ccRCC NSG-SGM3 mouse model, bearing luciferized skrc-59 CAIX<sup>+</sup> cells under the left kidney capsule, was established and used to compare two second-generation (28 $\zeta$  and BB $\zeta$ ) with a third-generation CAR (28BB $\zeta$ ) and investigate the impact of cellular composition on antitumor efficacy (Figure 2A). Ten groups were tested in this model, including CD8 only of 28 $\zeta$ , BB $\zeta$ , 28BB $\zeta$ , and UNT and CD4/8 of BB $\zeta$  and UNT at different doses (Figure S2). One week after implantation, tumor engraftment was confirmed by bioluminescence imaging (BLI) and followed by randomized grouping (n = 5 per group). One million, three million, or ten million

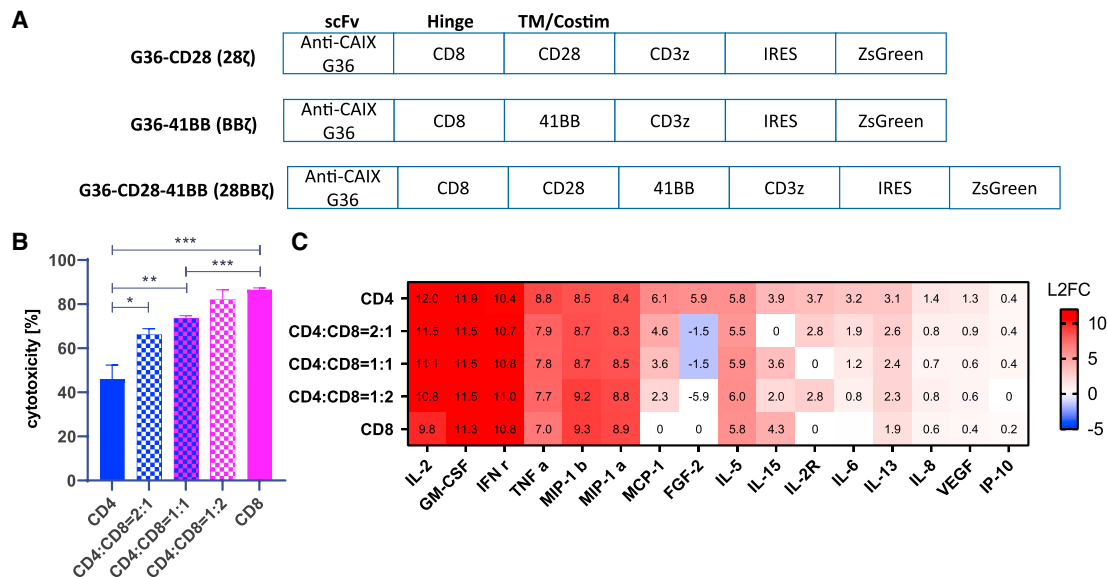

**Figure 1. Evaluation of anti-CAIX BBζ CAR-T cells *in vitro***

(A) Designs of anti-CAIX BBζ, 28ζ, and 28BBζ CAR-T cells. The same anti-CAIX G36 scFv was used as CAR moiety followed by CD8 hinge, costimulatory domain (s), and activation cassette CD3ζ. ZsGreen was introduced after IRES. (B) Cytotoxicity of anti-CAIX BBζ CAR-T cells with different CD4:CD8 composition ratios. From left to right, the cytotoxicity of CD4, CD4:CD8 = 2:1, CD4:CD8 = 1:1, CD4:CD8 = 1:2, and CD8 anti-CAIX BBζ CAR-T against CAIX-expressing skrc-59 cells is shown. *P* values are defined by unpaired two-tailed *t*-tests (\**p* < 0.05; \*\**p* < 0.01; \*\*\**p* < 0.001; and \*\*\*\**p* < 0.0001). (C) Heatmap of log<sub>2</sub> fold change cytokine and chemokine profiles in supernatant. After 48 h co-culture of skrc-59 tumor cells and CAR-T cells with different CD4:CD8 composition ratios, the media were assessed for cytokine and chemokine release. The fold change was defined by the value of experimental group divided by the one of UNT negative control. All values of fold change are labeled in the heatmap.

human CAR-T or UNT cells were injected through the tail vein (day 0). Tumor growth was monitored by BLI weekly and magnetic resonance imaging (MRI) biweekly. CAR-T cell expansion and persistence were evaluated by assessing peripheral blood via flow cytometry weekly.

These imaging studies over the course of 4 weeks showed that, in the CAR8 treatment groups, only BBζ CAR-T cells resulted in significant antitumor activity, whereas mice treated with 28ζ and 28BBζ CAR-T cells showed no inhibition of tumor growth compared with UNT CD8 control cells at a dosage of 3 million cells (Figures 2B and 2C). Decreasing the dose of BBζ CAR-T cells to 1 million cells, BBζ lost efficacy, while increasing the dose of 28BBζ CAR-T cells to 10 million cells, 28BBζ showed significant antitumor activity (Figure S2), demonstrating the dose-dependent therapeutic effect of CAR-T cells. In addition, the exhaustion marker PD-1 was profiled and demonstrated that peripheral circulating BBζ CAR-T cells had significantly lower PD-1 compared with 28ζ and 28BBζ CAR-T cells, which may contribute to the superior antitumor activity of BBζ CAR-T cells (Figure 3B).

When CAR8 was compared with CAR4/8, remarkably on day 28, the mice treated with BBζ CAR4/8 CAR-T cells did not show any tumor signals on BLI (Figure 2D). All mice from this group were carried for an additional 44 days (total 72 days post-treatment). At the endpoint, day 72 for BBζ CAR4/8 group and day 28 for the other five groups, the

tumors were collected and weighted (Figure 2E). The BBζ-CAR4/8-treated mice remained tumor free, and as already observed in the tumor growth curve, the BBζ CAR-T cell treatment displayed enhanced efficacy compared with the other CAR constructs (Figures 2C and 2E). Consistent with a greater therapeutic effect of BBζ CAR-T cell treatment, BBζ-treated tumors showed the least Ki67 compared with 28ζ and 28BBζ in immunohistochemistry (IHC) staining (Figure S4).

MRI was performed biweekly to confirm orthotopic tumor implantation and also detect tumor metastases. As shown in Figure 2G, metastatic lesions (red arrows) were observed in the abdominal cavity in all treatment groups except for CAR8 and CAR4/8 BBζ T cell groups.

**CAR4/8 cells exhibited enhanced long-term immune surveillance compared with CAR8**

We compared BBζ CAR8 and CAR4/8 *in vivo*; CAR4/8-treated mice (5/5) had no tumors even 72 days after the initial single-dose administration, while two mice (2/5) in the CAR8 group developed small tumors 4 weeks after CAR-T cell administration (Figures 2E and S3). However, the difference in tumor inhibition between CAR8 and CAR4/8 T cells within 28 days was not significant (Figure 2D). Limited proliferation and persistence of the CAR8 cells in peripheral blood of all constructs were observed compared with CAR4/8 cells, which were abundant after 72 days and provided long-term immune surveillance in the treated mice after tumor disappearance

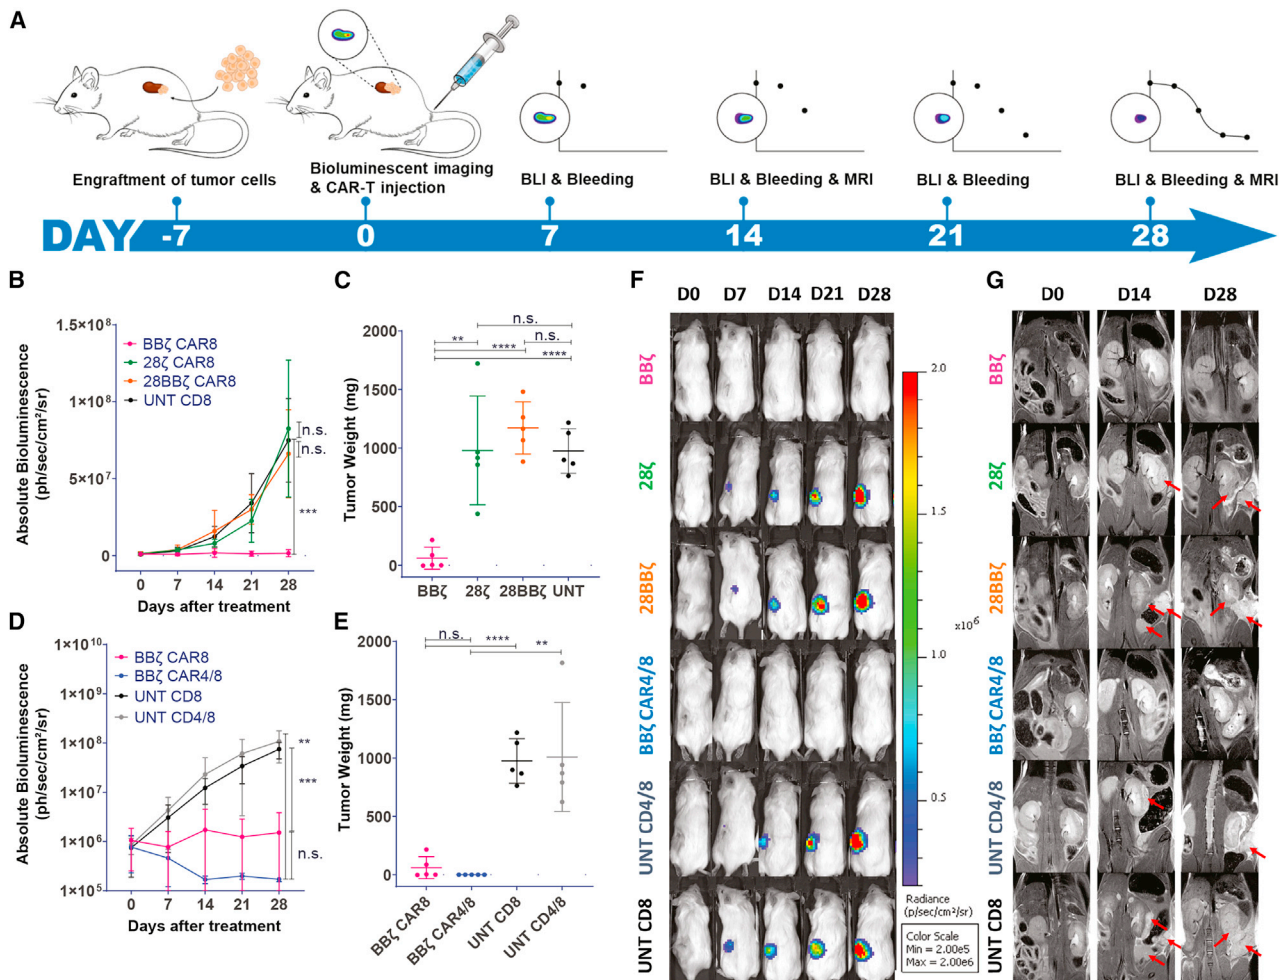

**Figure 2. Anti-CAIX BB $\zeta$  CAR4/8 T cells had superior activity in ccRCC orthotopic NSG-SGM3 mouse model**

(A) Timeline of the experiment. A week after tumor engraftment, BLI was performed to confirm tumor growth followed by CAR-T cell injection (day 0). BLI and bleeding were performed weekly to monitor tumor growth and CAR-T persistence. MRI was performed biweekly to monitor tumor growth and metastasis. (B) Tumor growth curve of the mice treated with 3 million of anti-CAIX BB $\zeta$  (pink curve), 28 $\zeta$  (green curve), and 28BB $\zeta$  (orange curve) CAR-T cells and UNT (black curve) cells. n.s., not significant. *P* values are defined by ANOVA (\**p* < 0.05; \*\**p* < 0.01; \*\*\**p* < 0.001; and \*\*\*\**p* < 0.0001). (C) Tumor weight of anti-CAIX BB $\zeta$  CAR-T cells (pink circle) compared with 28 $\zeta$  (green circle) and 28BB $\zeta$  (orange circle) CAR-T cells and UNT (black circle). *P* values are defined by unpaired two-tailed *t*-tests (\**p* < 0.05; \*\**p* < 0.01; \*\*\**p* < 0.001; and \*\*\*\**p* < 0.0001). (D) Tumor growth curve of the mice treated with 3 million of anti-CAIX BB $\zeta$  CAR8 (pink curve), BB $\zeta$  CAR4/8 (blue curve), UNT CD8 (black curve), and UNT CD4/8 (gray curve) cells. *P* values are defined by ANOVA (\**p* < 0.05; \*\**p* < 0.01; \*\*\**p* < 0.001; and \*\*\*\**p* < 0.0001). (E) Tumor weight of CAR8 (pink curve) and CAR4/8 (blue curve) of BB $\zeta$  CAR-T cells compared with the CD8 (black curve) and CD4/8 (gray curve) of UNT cells. *P* values are defined by unpaired two-tailed *t*-tests (\**p* < 0.05; \*\**p* < 0.01; \*\*\**p* < 0.001; and \*\*\*\**p* < 0.0001). Note that the endpoint of BB $\zeta$  CAR4/8 group is day 72 instead of day 28. (F) BLI images of mice treated with 3 million of BB $\zeta$ , 28 $\zeta$ , 28BB $\zeta$ , BB $\zeta$ -CAR4/8, UNT CD4/8, and UNT CD8 cells are shown here. (G) Day 0 (D0), D14, and D28 of MRI on BB $\zeta$ -, 28 $\zeta$ -, 28BB $\zeta$ -, BB $\zeta$ -CAR4/8-, UNT-CD4/8-, and UNT-CD8-treated mice. Red arrow indicates the tumor site. All data with error bars are presented as mean  $\pm$  SD.

(Figure 3A). BB $\zeta$  CAR8 and CAR4/8 cells exhibited effective tumor control and remarkable tumor regression that can be seen even on day 7 (Figure 2F).

On day 72, we profiled circulating CAR4/8 cells in peripheral blood and observed that the CD4:CD8 ratio had changed from the initial 2:1 to about 1:1 (Figure 3D). There was no significant difference in CAR expression (Figure 3E) or in exhaustion marker expression or memory phenotype between CD4 and CD8 CAR-T cells (Figures

3F and 3G). Due to the potent antitumor activity of BB $\zeta$  CAR4/8 cells, there were no tumors in BB $\zeta$ -CAR4/8-treated group. Thus, tumor-infiltrating BB $\zeta$  CAR4/8 could not be profiled via scRNA-seq.

#### Flow and scRNA-seq analysis of tumor-infiltrating T cells

To investigate tumor-infiltrating T cells, tumor tissues collected from mice were dissociated into single-cell suspensions. Tumor-infiltrating lymphocytes (TILs) from the groups of BB $\zeta$  CAR8, 28 $\zeta$  CAR8, 28BB $\zeta$  CAR8, CD4/8 UNT, and CD8 UNT at the



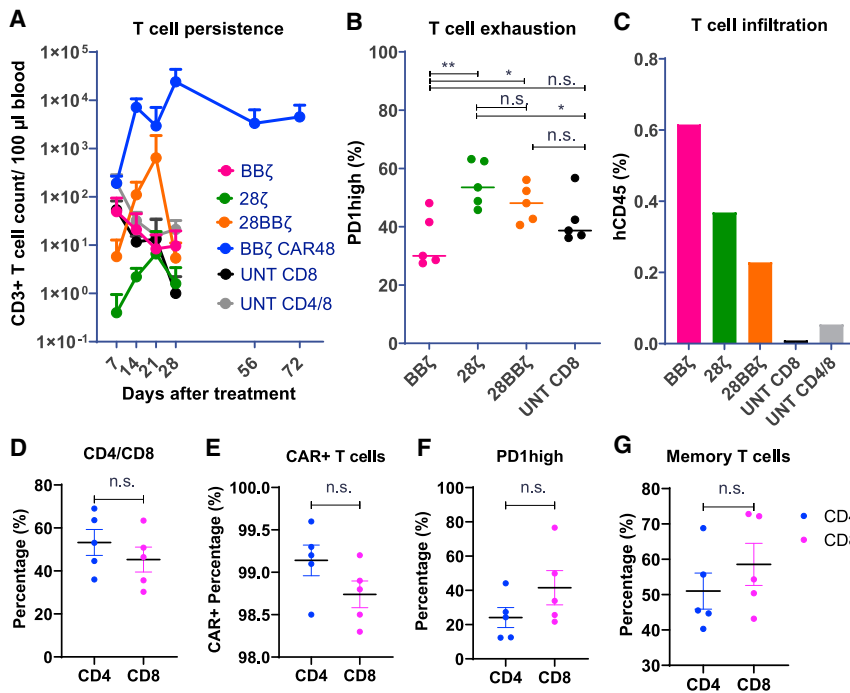

**Figure 3. Flow cytometry analysis of peripheral circulating and tumor-infiltrating CAR-T cells**

(A) T cell count in peripheral blood. Peripheral blood was analyzed weekly via flow cytometry. T cell count per 100  $\mu$ L was quantified in BB $\zeta$  CAR8 (pink), 28 $\zeta$  CAR8 (green), 28BB CAR8 (orange), and BB $\zeta$  CAR4/8 (blue) CAR-T cells and CD8 (black) and CD4/8 (gray) UNT cells. (B) Exhaustion of peripheral circulating T cells. The percentage of PD-1 high-expressing T cells was quantified in BB $\zeta$  CAR8 (pink), 28 $\zeta$  CAR8 (green), 28BB CAR8 (orange), and CD8 (black) UNT cells on day 7. *P* values are defined by unpaired two-tailed *t*-tests (\**p* < 0.05; \*\**p* < 0.01; \*\*\**p* < 0.001; and \*\*\*\**p* < 0.0001). (C) Tumor-infiltrating T cell percentage. At the endpoint of the animal study, tumor-infiltrating human CD45<sup>+</sup> lymphocytes were isolated. T cell infiltration of BB $\zeta$  (pink), 28 $\zeta$  (green), 28BB $\zeta$  (orange), and BB $\zeta$  CD4/8 (blue) CAR-T cells and CD8 (black) and CD4/8 (gray) UNT cells in tumors was quantified. The percentage was defined by human CD45 population divided by total viable cells. (D) Percent CD4 and CD8 TILs. (E) CAR<sup>+</sup> percentage. (F and G) Exhaustion marker expression (PD-1 high; F) and the memory T cell subset (CD45RO<sup>+</sup>CD45RA<sup>-</sup>; G) of CAR4/8 BB $\zeta$  CAR-T cells on day 72 were analyzed. ZsGreen signal was used to define CAR<sup>+</sup> population. *P* values are defined by unpaired two-tailed *t*-tests (\**p* < 0.05; \*\**p* < 0.01; \*\*\**p* < 0.001; and \*\*\*\**p* < 0.0001).

dosage of 3 million cells were sorted and characterized. BB $\zeta$  CAR-T cells showed the highest infiltration among the different constructs with circa 0.6% human CD45-positive cells of total viable cells. 28 $\zeta$  CAR8, 28BB $\zeta$  CAR8, CD4/8 UNT, and CD8 UNT groups had progressively lower levels of tumor infiltration, indicating that BB $\zeta$  CAR-T cells have the most favorable trafficking among these three CAR constructs. CD4/8 UNT cells exhibited higher tumor penetration compared with CD8 UNT (Figure 3C).

The sorted TILs were labeled with hashtag antibodies and pooled together to study their transcriptional profile via 10X Genomics scRNA-seq. A total of 14,446 single human T cell transcriptomes were obtained. Following quality control, 2,100 BB $\zeta$ , 2,280 28 $\zeta$ , 2,569 28BB $\zeta$ , 254 CD8 UNT, and 1,256 CD4/8 UNT cells were assigned to barcodes (demultiplexing) by independent components analysis (ICA) and were visualized with t-distributed stochastic neighbor embedding (t-SNE) plots in Figure 4A. TILs from the three CAR-T conditions grouped in the upper part of the plot and were visually distinct from the two UNT cell conditions that grouped in the lower part of the plot. The TILs grouped into 19 clusters (Figures S5A and S5B) using Louvain community detection to partition a graph in which cells were weighted by the number of shared nearest neighbors. Clusters included tissue-resident memory CD8 T cells (cluster 10), which were enriched in BB $\zeta$ , PDGFA<sup>+</sup> tissue-resident CD8 Treg cells (cluster 12) enriched in 28 $\zeta$ , and dysfunctional CD8 T cells (cluster 3) enriched in 28BB $\zeta$ . In addition, CD40L<sup>+</sup> CD4 naive T cells (cluster 11) and CXCL13-producing follicular helper CD4 T cells (cluster 15) were enriched in CD4/8 UNT (Figure S5C).

**Transcriptomic signatures of tumor-infiltrating CAR8 cells**

Analysis of differentially expressed genes (DEGs) revealed differences in activation-, function-, and exhaustion-associated gene expression among the three CAR8 groups (Figure 5A; Table S1). BB $\zeta$  CAR8 cells showed high expression of major histocompatibility complex class II (MHC II) genes, including histocompatibility leukocyte antigen (HLA)-DPA1 and HLA-DRB1 (Figures 5C and S6), similar to the *in vitro* cultured 4-1BB CAR-T cells with and without stimulation reported before.<sup>23</sup> The elevated MHC class II expression may facilitate epitope spreading via enhanced antigen presentation.

Among the three CAR8 groups, BB $\zeta$  CAR-T cells expressed highest levels of cell-mediated-cytotoxicity-associated genes, such as the chemoattractants XCL1 and XCL2 and CD161 (KLRB1), which upregulate IFN- $\gamma$  secretion<sup>30</sup> and stimulate innate response,<sup>31</sup> and also had the lowest expression levels of activation-associated gene (IL-2RA), inhibitory immune checkpoint receptors (CTLA-4, LAG-3, and GITR), and AP-1/ATF superfamily transcription factor BATF (Figure 5B). These results illustrated that 4-1BB signaling is able to promote CD8 T cell cytotoxicity and persistence, as well as reduce exhaustion *in vivo*.

Despite the effect of 4-1BB on CD8 T cells, it has been reported that 4-1BB agonist can stimulate pro-inflammatory cytokine production from CD4 effector T cells and modulate suppressive Treg cells.<sup>32</sup> Consequently, we studied the distribution of Treg cells among the three CAR8 groups, revealing that the presence of 4-1BB significantly inhibited the differentiation of CD8 Treg cells (Figures 4B and 4C),

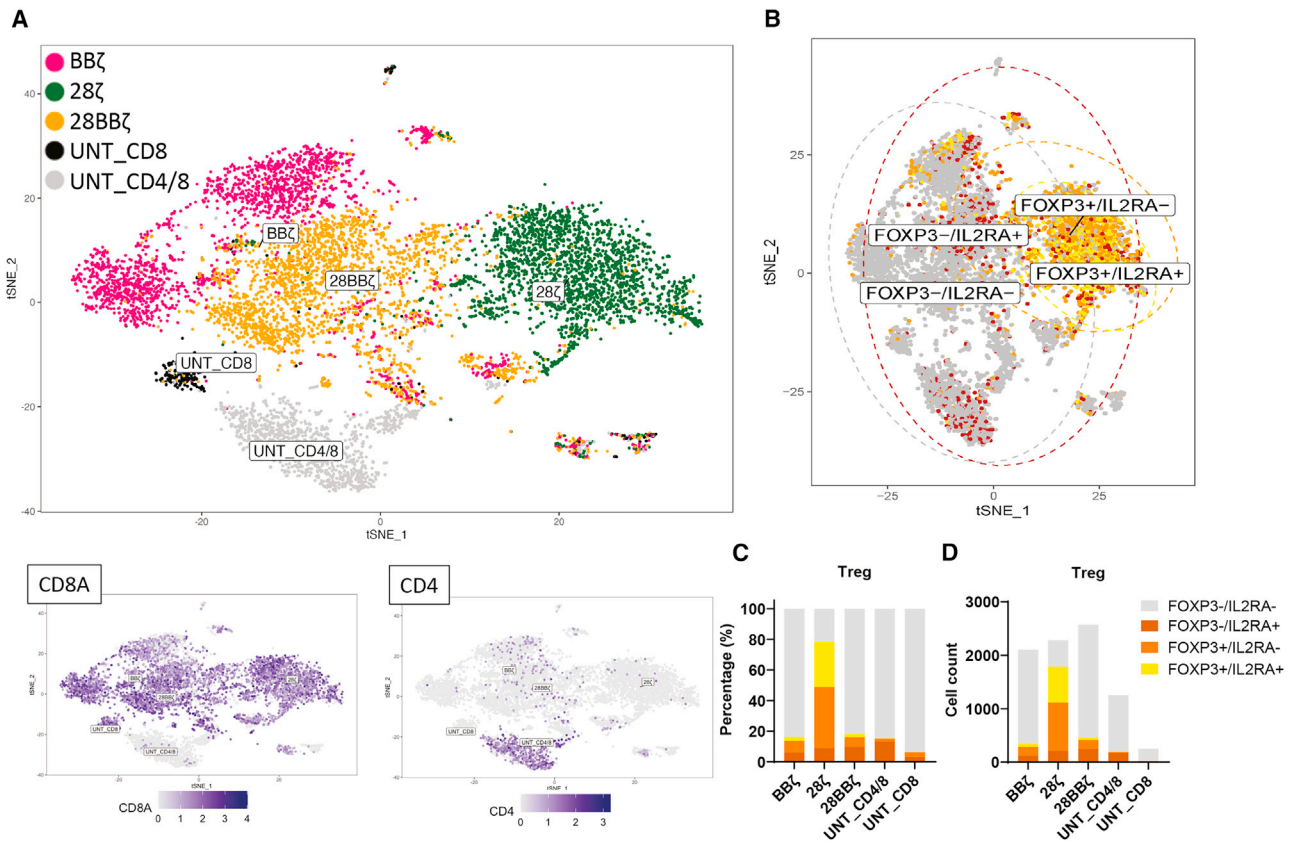

**Figure 4. scRNA-seq analysis of tumor-infiltrating T cells**

(A) t-SNE plot of tumor-infiltrating BB $\zeta$  CAR8 (pink), 28 $\zeta$  CAR8 (green), and 28BB $\zeta$  CAR8 (orange) cells and CD8 UNT (black) and CD4/8 UNT (gray) cells. CD4 and CD8 gene distribution is shown in the lower t-SNE plots. (B) CD8 regulatory T cell (Treg cell) subset analysis of the five treatments by determining FOXP3 and IL-2RA (CD25) gene expression. FOXP3<sup>-</sup>IL-2RA<sup>-</sup> (gray), FOXP3<sup>-</sup>IL-2RA<sup>+</sup> (brown), FOXP3<sup>+</sup>IL-2RA<sup>-</sup> (orange), and FOXP3<sup>+</sup>IL-2RA<sup>+</sup> (yellow) distribution is shown in the t-SNE plot. (C and D) Quantification of the percentage (C) and cell count (D) of each population.

which were defined by overexpression of FOXP3 and IL-2RA (CD25).<sup>33,34</sup>

In contrast, tumor-infiltrating 28 $\zeta$  CAR-T cells showed the highest proportion of CD8 Treg cells with 78.3% cells expressing either FOXP3 or IL-2RA and a terminal exhausted T cell phenotype (PD-1, LAG-3, and CTLA-4; Figure 5B). 28BB $\zeta$  CAR-T cells showed similar CD8 Treg cell percentage compared with BB $\zeta$ ; however, 28BB $\zeta$  displayed poorer therapeutic effects in the ccRCC orthotopic mouse model than BB $\zeta$  at the same dosage of 3 million cells. Using Reactome pathway analysis, we identified a few deactivated pathways in 28BB $\zeta$  compared with BB $\zeta$  CAR-T cells, including formyl peptide receptor, IL-6, IL-15, and leptin pathways, indicating that the CD28 module attenuated trafficking and cytotoxicity of 28BB $\zeta$  CAR-T cells (Figure S7; Tables S4 and S5).

#### Transcriptomic signatures of tumor-infiltrating UNT cells

While neither UNT-CD8 or CD4/8 treatments were able to halt tumor growth in mice, we were interested in determining any contribution of CD4 cells to the overall transcriptional profile of the TILs that

could provide additional information on the superiority of BB $\zeta$  CAR4/8 over BB $\zeta$  CAR8 T cells in curing the mice of their tumors. Here, we compared tumor-infiltrating CD8 only and the CD4/8 mixture of UNT cells (Figure 6A; Table S2). Increased MHC II gene (HLA-DRB1) and memory T cell gene (KLF6 and IL-7R), as well as decreased activation marker (GZMB) and exhaustion marker (NR4A2) gene expression were observed in CD4/8 UNT cells. Interestingly, we also found the upregulation of JUN in the CD4/8 mixture (Figure 6B). Its gene product c-Jun has been engineered in CAR-T cells, as c-Jun overexpression was linked to long-term proliferation capacity,<sup>35</sup> which may result in the high amount of circulating BB $\zeta$  CAR4/8 cells that were observed 72 days after the single-dose administration.

We also performed DEGs analysis to compare CD8 T cells in the CD8-only group with those in the CD4/8 mixture group (Figure 6C; Table S3). We were able to recover 147 CD8 T cells from UNT CD8 group and 40 from UNT CD4/8 group. Increased MHC II gene (HLA-DRB1 and HLA-DQA1) and memory T cell gene (IL-7R), as well as decreased activation marker (GZMA and GZMB) gene

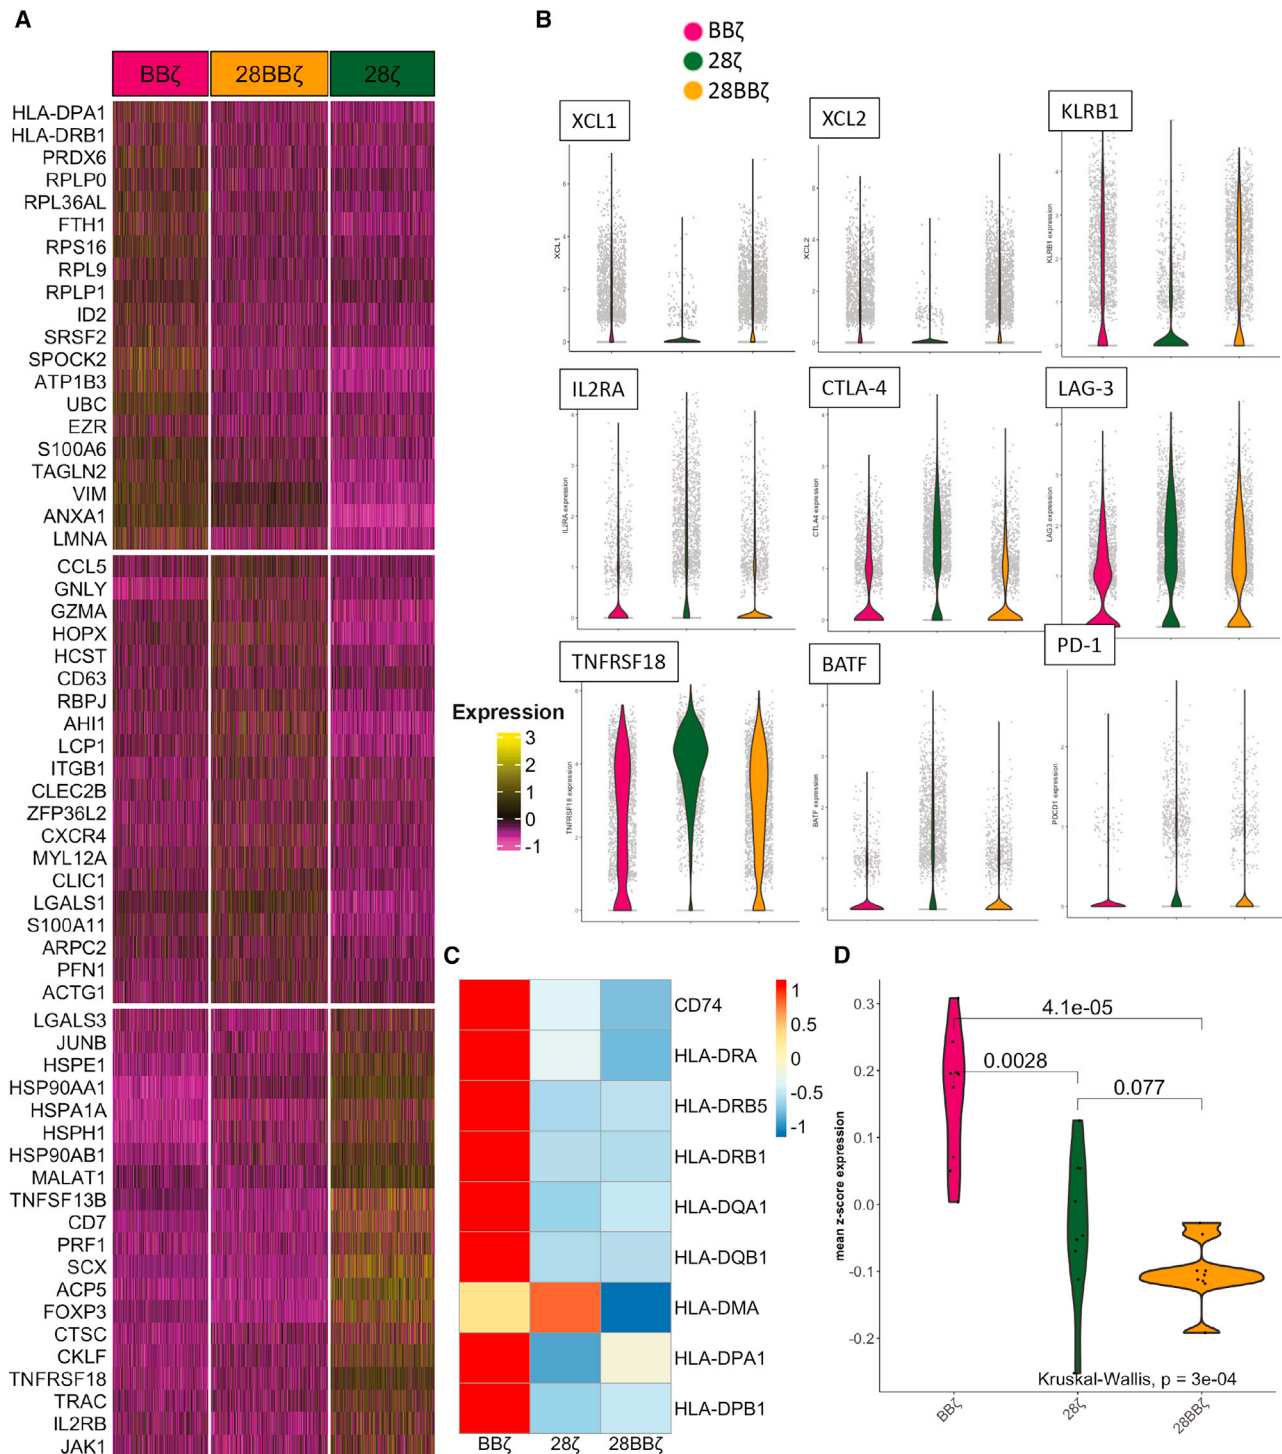

**Figure 5. Transcriptional signatures of tumor-infiltrating BBζ CAR8, 28ζ CAR8, and 28BBζ CAR8 cells**

(A) Heatmap of top 20 differential expression genes from each group in the comparison of BBζ (pink), 28ζ (green), and 28BBζ (orange) CAR-T cells. (B) Gene expression of XCL1, XCL2, KLRB1, IL-2RA, CTLA-4, LAG-3, TNFRSF18 (GITR), BATF, and PD-1 in BBζ (pink), 28ζ (green), and 28BBζ (orange) CAR-T cells. (C) HLA class II gene expression in BBζ, 28ζ, and 28BBζ CAR-T cells. CD74, HLA-DRA, HLA-DRB5, HLA-DRB1, HLA-DQA1, HLA-DQB1, HLA-DMA, HLA-DPA1, and HLA-DPB1 are shown in the heatmap after removing seven low-expression genes HLA-DQB1-AS1, HLA-DQA2, HLA-DQB2, HLA-DOB, HLA-DMB, HLA-DOA, and CLITA (Figure S6). (D) Violin plot of mean Z score expression of MHC class II gene expression in BBζ CAR8 (pink), 28ζ CAR8 (green), and 28BBζ CAR8 (orange). A Kruskal-Wallis rank-sum test was applied.

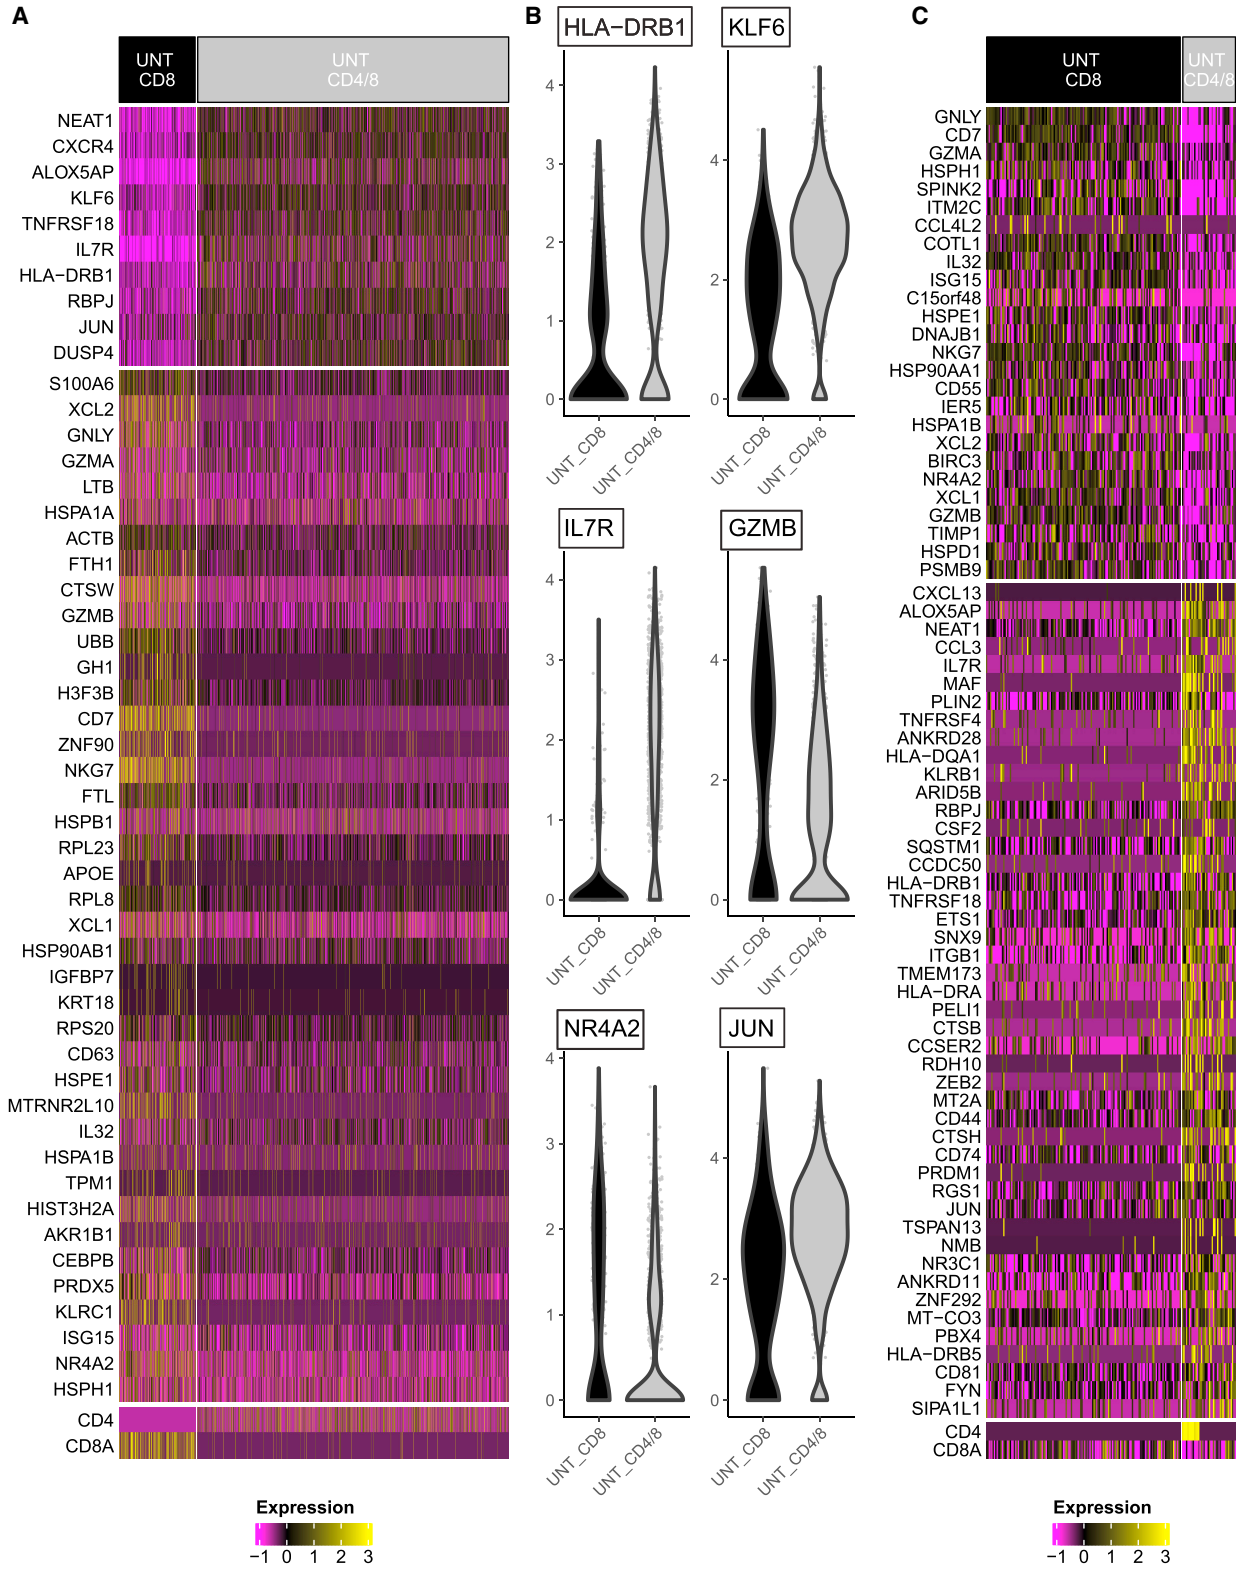

(legend on next page)



expression were observed in CD8 cells recovered from UNT CD4/8 group. Interestingly, we also observed 13 CD4 CD8 co-expressing T cells in UNT CD4/8 group, which have been reported to produce enhanced Th2 cytokines.<sup>36</sup>

These results suggest that CD4 T cells contributed to the complete tumor elimination by BB $\zeta$  CAR4/8 through improving antigen presentation, enhancing proliferative potential, increasing functional capacity, diminishing terminal differentiation, and elevating T cell persistence.

## DISCUSSION

To optimize CAR-T cell therapy for ccRCC, we investigated different costimulatory signaling domains in the same CAIX-targeted CAR and interrogated the cellular composition of the CAR-T product *in vivo* using a ccRCC orthotopic xenograft mouse model. We showed that anti-CAIX BB $\zeta$  CAR8 cells exhibited superior efficacy compared with 28 $\zeta$  and 28BB $\zeta$  CAR8 cells. We further demonstrated the even more superior efficacy, persistence, and long-term immune surveillance of the BB $\zeta$  CAR4/8 cells. We generated a transcriptional atlas of tumor-infiltrating BB $\zeta$ , 28 $\zeta$ , and 28BB $\zeta$  CAR8 cells, as well as CD8 UNT and CD4/8 UNT cells to understand the therapeutic outcome mediated by the intracellular costimulatory domains and the CD4:CD8 ratio of the CAR-T product. We demonstrated that BB $\zeta$  CAR-T cells upregulated MHC II genes and cytotoxic-associated genes, downregulated exhaustion markers, and significantly diminished CD8 Treg cells, whereas CD4 T cells helped CD8 T cells maintain the favored memory phenotype *in vivo*. These results not only showed the exceptional therapeutic efficacy of BB $\zeta$  CAR8 and CAR4/8 against ccRCC *in vivo* but also uncovered favorable transcriptional programs associated with the 4-1BB costimulation cassette and cellular composition.

Costimulatory domains in general enhance T cell proliferation, cytokine secretion, cytotoxic function, memory formation, and survival.<sup>37</sup> The immunoglobulin (Ig) superfamily member CD28 is considered the prototypical T cell costimulatory receptor and competes with its co-inhibitory receptor counterpart CTLA4 for binding to the B7 molecules CD80 and CD86 on antigen-presenting cells (APCs).<sup>38</sup> In comparison, 4-1BB (TNFRSF9 and CD137), a TNFR superfamily member, is expressed on a subset of resting CD8 T cells and is upregulated on both CD4 and CD8 T cells following activation.<sup>39</sup> CD28 is critical for the initial activation of naive T cells, while 4-1BB is more important in previously activated T cells. It has been reported that, in animal studies, CD28-costimulated CAR-T cells exhibit improved early expansion and cytotoxic activity compared with their 4-1BB-costimulated counterparts *in vivo*, while 4-1BB-costimulated CAR-T cells exhibit better long-term persistence.<sup>6,7,14,40–42</sup>

In our ccRCC orthotopic mouse model, BB $\zeta$  exhibited excellent therapeutic effects and persistence compared with 28 $\zeta$  and 28BB $\zeta$  CAR-T cells.

The third-generation CAR-T cells were reported to have superior efficacy that benefits from combining the tumoricidal capacity of CD28-based CARs with the persistence generated by 4-1BB-based CARs in CD19-targeted therapy both in a xenograft mouse model and in the clinic.<sup>14,43–45</sup> We did observe the induction of strong intrinsic activation of the type I IFN pathway in 28BB $\zeta$  CAR-T cells (cluster 13) as reported before<sup>14</sup> as well as cluster 14, which has upregulated CD38 TIGIT expression (Figure S5).<sup>46</sup> 28 $\zeta$  had significantly more CD8 Treg cells, while 28BB $\zeta$  and BB $\zeta$  had few CD8 Treg cells (Figures 4B and 4C); however, 28BB $\zeta$  did not have superior efficacy or persistence *in vivo*. We speculate from the pathway analysis on several reasons why 28BB $\zeta$  CAR-T cells may have decreased therapeutic efficacy compared with BB $\zeta$  (Figure S7). First, the downregulation of formyl peptide chemotaxis receptors may lead to less chemotactic recruitment of CAR-T cells to the tumor site, which was seen in the lower number of tumor-infiltrating 28BB $\zeta$  CAR-T cells compared with BB $\zeta$  (Figure 3C). Second, 28BB $\zeta$  CAR-T cells had less activated IL-6 and IL-15 pathways, indicating attenuated cytotoxicity against tumor cells compared with BB $\zeta$  CAR-T cells. Finally, downregulating leptin pathway could inhibit the specific activation of 28BB $\zeta$  effector CAR-T cells.<sup>47</sup>

In solid-tumor CAR-T cell therapies, different tumor types may be susceptible to distinct costimulatory domains. For example, in an anti-B7-H3 CAR study in three animal models, including non-small cell lung cancer (NSCLC) and osteosarcoma, the authors showed that the CD28 second-generation CAR-T cells have superior antitumor activity in comparison with those with a 4-1BB costimulatory domain.<sup>48</sup> The molecular signatures that are associated with these differential outcomes by solid-tumor-infiltrating CAR cells have not been elucidated to date but can be delineated at the single-cell transcriptional level. We profiled CAR-T cells isolated from tumor tissues and illustrated the transcriptional signatures of BB $\zeta$ , 28 $\zeta$ , and 28BB $\zeta$  CAR-T cells as well as CD8 and CD4/8 UNT cells. Interestingly, the BB $\zeta$  signatures are consistent with those of the *in vitro* cultured CD19 BB $\zeta$  and EGFR BB $\zeta$  CAR-T cells,<sup>23</sup> including a higher MHC II gene expression and an enriched memory phenotype compared with 28 $\zeta$  CAR-T cells.

Our results showed that multiple MHC class II genes increased in BB $\zeta$  compared with 28 $\zeta$  and 28BB $\zeta$  (Figure 5C), including HLA-DR, which is recognized as a marker of T cell activation.<sup>49–53</sup> We hypothesize that activated human CAR-T cells promote a T cell response through modulating MHC class II expression. However, when we

### Figure 6. Transcriptional signatures of tumor-infiltrating CD8 UNT and CD4/8 UNT cells

(A) Heatmap of top 50 differential expression genes in the comparison between CD8 UNT (black) and CD4/8 (gray) UNT cells. (B) Gene expression of HLA-DRB1, KLF6, IL-7R, GZMB, NR4A2, and JUN in CD8 (black) and CD4/8 (gray) UNT cells. (C) Heatmap of top 72 differential expression genes in the comparison between CD8 T cells in CD8 UNT (black) and the ones in CD4/8 (gray) UNT cells.

investigated the antigen-presenting function of MHC class II molecules on BB $\zeta$  CAR8 cells, we did not observe a corresponding upregulation of CD80 or CD86 (data not shown). The antigen-presenting function could be further validated in a humanized mouse model with endogenous tumor microenvironment (TME) via T cell repertoire analysis.

In contemporary trials, patients are typically administered with CD4/CD8 mixed CAR-T cell products, including Yescarta and Kymriah with a fixed CD4/8 ratio of 1 and Tecartus (brexucabtagene autoleucel) with a median CD4/8 ratio of 0.7.<sup>5,7,9</sup> In this study, we observed the more rapid expansion of CD8 BB $\zeta$  CAR-T cells in the CD4/8 mixture *in vivo*, resulting in the CD4/8 ratio changing from 2:1 to about 1:1. Our study demonstrated that it is optimal to utilize CD4 and CD8 T cell mixture to generate CAR-T cells, as CD4 secreted higher levels of cytokines *in vitro* and CAR4/8 cells have superior efficacy and persistence *in vivo* compared with CAR8. However, no specific cytokine release pattern, such as CD4-dependent Th1/Tc1 or Th2/Tc2, was found *in vitro*.

There are several limitations in this study. First, we only profiled the transcriptome of tumor-infiltrating CAR-T cells at the endpoint. However, multiple time points should be included to monitor the dynamic change of CAR-T signatures. It would be ideal to compare pre-infusion CAR-T cells with tumor-resident and circulating CAR-T cells to understand their dynamic activation and differentiation. Second, the ccRCC orthotopic mouse model was built in NSG-SGM3 mouse, which has diminished innate immunity, in particular lower macrophage function and NK activity.<sup>54–56</sup> This model may not provide a suitable TME to study the crosstalk between CAR-T cells and endogenous immune cells.<sup>57</sup> We look forward to translating cell therapy evaluation to a humanized NSG-SGM3 mouse model. Third, we only compared conventional CD8 CAR-T cells with a CD4/8 2:1 mixture *in vivo*. However, CD4 alone should be evaluated, as cytolytic CD4 CAR-T cells have been shown to be potent.<sup>17,18</sup> In the future, in addition to scRNA-seq, we plan to incorporate cellular indexing of transcriptomes and epitopes (CITE)-seq and other methods to verify proteomic expression of the important biomarkers identified from transcriptional studies.

Taken together, by using skrc-59 cells and the ccRCC-NSG-SGM3 mouse model, we evaluated anti-CAIX CAR-T cells with different costimulatory domains (BB $\zeta$ , 28 $\zeta$ , and 28BB $\zeta$ ) and studied their therapeutic effects and the influence of their CD4/CD8 cellular composition. The results revealed unique as well as some overlapping transcriptional signatures of tumor-infiltrating BB $\zeta$ , 28 $\zeta$ , and 28BB $\zeta$  CAR-T cells as well as CD8 UNT and CD4/8 UNT cells. We found that CAIX-targeted, second-generation BB $\zeta$  CAR-T cells with a CD4/8 ratio of 2:1 exhibited outstanding long-term tumor regression and inhibition with one single dose of 3 million cells. This resulted from enhanced cytotoxic capacity, an enriched memory phenotype, downregulation of terminal exhaustion markers, diminished CD8 Treg cell differentiation, and increased persistence leading to immune surveillance. We believe that anti-CAIX BB $\zeta$

CAR4/8 CAR-T cells have the potential to be translated to clinic for treatment of ccRCC.

## MATERIALS AND METHODS

### Cell lines and culture

Human ccRCC cell line skrc-59 (obtained from Dr. Gerd Ritter, Memorial Sloan-Kettering Cancer Center, New York, USA) was engineered to express high levels of human CAIX (skrc-59 CAIX<sup>+</sup>)<sup>25</sup> and mCardinal fluorophore. These cells were grown in RPMI-1640 medium (Gibco) supplemented with 10% (v/v) heat-inactivated fetal bovine serum (FBS) (Gibco) at 37°C with 5% CO<sub>2</sub>.

### Production of lentivirus particles

For lentivirus production, polyethylenimine (PEI), DNA of the helper plasmids vesicular stomatitis virus G protein (VSV-G), TAT, GAG, and REV (10  $\mu$ g per 15 cm dish of 293T cells) and 20  $\mu$ g of the respective CAR DNA was added to Opti-MEM medium (Gibco). This mixture was incubated for 20 min at room temperature (RT) and was afterward added drop by drop to a 15-cm dish of LentiX-293T cells (Clontech Laboratories). After 48 h of incubation, the supernatant was collected, debris was removed, and lentiviral concentrator (Clontech) was added in a 1:3 (v/v) ratio. This mixture was incubated overnight at 4°C; the next day, the tubes were centrifuged for 45 min at 1,500 g and the supernatant was discarded. The pelleted lentivirus was resuspended in RPMI-1640 medium and stored at –80°C.

### Generation of CAR-T cells

Human PBMCs were either purchased commercially (STEMCELL Technologies) or separated from apheresis leukoreduction collars obtained from the blood bank of the Brigham and Women's Hospital under a Dana-Farber Cancer Institute (DFCI)-approved IRB protocol no. 14–343 using Ficoll-Paque-PLUS (GE Healthcare). CD4 and CD8 T cells were isolated by using CD8 MicroBeads and CD4 MicroBeads (Miltenyi Biotec) accordingly from PBMCs. T cells were cultured by using RPMI-1640 medium supplemented with 10% FBS, IL-21 (30 ng/mL; Miltenyi Biotec) and activated by T cell TransAct (Miltenyi Biotec). CAR-T cells were generated by using lentiviral transduction (MOI 20) with 10  $\mu$ g/mL diethylaminoethyl (DEAE). The CAR-positive T cells were sorted by SONY sorter MA900 (Sony Biotechnology). After sorting, the T cells were cultured in RPMI-1640 medium supplemented with 10% FBS, IL-7 (5 ng/mL; Miltenyi Biotec), IL-15 (2.5 ng/mL; Miltenyi Biotec), and gentamicin (50  $\mu$ g/mL; Gibco).

### Celigo *in vitro* killing assay

Approximately 3,000 skrc-59 tumor cells (target cells) were seeded in a 96-well plate (Greiner). After 12 h of incubation, the plate was scanned and analyzed in bright-field and far-red channel for mCardinal as the 0-h time point. CAR-T cells were added and co-incubated with the target cells. Additional control wells were prepared with target cells only (negative control) and target cells with 1% Triton X (positive control). Subsequently, the plate was

scanned and analyzed at the 48 h time point with the equation

$$\text{Cytotoxicity \%} = \frac{\text{negative control} - \text{treatment}}{\text{negative control} - \text{positive control}} \times 100.$$

### Multiplexed cytokine profiling

The supernatant collected from *in vitro* cultures after 48 h of incubation of CAR-T cells with target cells was used for cytokine profiling using Luminex human magnetic 30-plex kit (Life Technologies) on a Luminex MAGPIX system (Life Technologies). Conditioned media concentration levels (pg/mL) of each protein were derived from five-parameter, curve-fitting models.

### Flow cytometry

All samples were analyzed with an LSR Fortessa (BD Bioscience), and data were analyzed using FlowJo software (FlowJo). T cell phenotype was evaluated via Zombie Yellow Fixable Viability Kit (BioLegend), human CD45 (clone HI30; BioLegend), mouse CD45 (clone 30F11; BioLegend), CD3 (clone OKT3; BioLegend), CD4 (clone A161A1; BioLegend), CD8 (clone SK1; BioLegend), PD-1 (clone MIH4; BD Bioscience), CD45RO (clone UCHL1; BioLegend), and CD45RA (HI100; BioLegend).

### *In vivo* orthotopic ccRCC model

All mice were housed and treated in ethical compliance with DFCI IACUC approved protocols. A total of  $5 \times 10^4$  skrc-59 CAIX<sup>+</sup> luciferase<sup>+</sup> cells were resuspended in 10  $\mu$ L of RPMI-1640 medium and diluted 1:1 in Matrigel (Corning Life Sciences). This cell mixture was injected under the left kidney capsule of NSG-SGM3 mice (Jackson Laboratory). One week after, tumor engraftment was confirmed with BLI and different doses of CAR-T cells or UNT cells were injected through the tail vein of the mice (day 0; n = 5 mice per group). The tumor BLI was determined 7, 14, 21, and 28 days post-CAR-T cell injection. MRI was performed on day 0, day 14, and day 28. The mice were euthanized by CO<sub>2</sub> inhalation, final blood was drawn, and organs and tumors were harvested for downstream analysis.

### Bioluminescence imaging (BLI)

Tumor growth was monitored weekly using the IVIS Spectrum In Vivo Imaging System (PerkinElmer). Briefly, mice were injected subcutaneously with 75 mg/kg D-luciferin potassium salt (Promega E1605) in sterile PBS and anesthetized with 2% isoflurane in medical air. Serial bioluminescence images were acquired using the automated exposure setup. The peak bioluminescence signal intensity within selected regions of interest (ROIs) was quantified using the Living Image Software (PerkinElmer) and expressed as photon flux (p/s/cm<sup>2</sup>/sr). Representative planar bioluminescence images were displayed with indicated adjusted minimal and maximal thresholds.

### Small-animal magnetic resonance imaging (MRI)

MRI experiments were performed on a Bruker BioSpec 7T/30 cm USR horizontal bore Superconducting Magnet System (Bruker) equipped with the B-GA12S2 gradient and integrated with up to second-order RT shim system, which provides a maximum gradient amplitude of 440 mT/m and slew rate of 3440 T/m/s. The Bruker-

made 35-mm ID volume radiofrequency (RF) coil was used for both RF excitation and receiving. The Bruker AutoPac with laser positioning was used for accurate definition of the ROI. Animals were anesthetized with 1.5% isoflurane mixed in medical air at a flow rate of 2 L/min. Body temperature was maintained at 37°C using a warm-air fan. A pressure transducer for respiratory gating was placed on the abdomen. Animal respiration and temperature were monitored and regulated by the SAI1 (Sa Instruments) monitoring and gating system model 1025T. Bruker Paravision 6.0.1 was used for MRI data acquisition. T2 weighted images of the kidneys were obtained engaging a fast spin echo (rapid acquisition with refocusing echoes [RARE]) with fat-suppression sequence. The following parameters were used: repetition time (TR) = 2,306 ms; time to echo (TE) = 27 ms; rare factor = 8; number of averages = 8; total acquisition time 5:30 min; field of view (FOV) = 35  $\times$  24 mm<sup>2</sup>; matrix size = 256  $\times$  192; spatial resolution = 136  $\times$  125  $\mu$ m<sup>2</sup>; slice thickness = 0.7 mm; and number of slices = 24.

### Tumor dissociation and tumor-infiltrating CAR-T cell isolation

Renal tumor samples were dissociated into single cells by a semi-automated combined mechanical and enzymatic process. The tumor tissue was cut into pieces of 2 to 3 mm in size and transferred to C Tubes (Miltenyi Biotec) containing a mix of enzymes H, R, and A (Tumor Dissociation Kit, human; Miltenyi Biotec). Mechanical dissociation was accomplished by performing a program (37C\_h\_TDK\_1) on the gentleMACS Octo Dissociator with Heaters (Miltenyi Biotec). Single-cell suspensions generated from ccRCC tumor samples were fluorescence-activated cell sorting (FACS) sorted on a SONY MA900 sorter (SONY) for viable human T cells (Zombie<sup>-</sup>mCD45<sup>-</sup>hCD45<sup>+</sup>CD3<sup>+</sup>; BioLegend).

### RNA-seq 10X Genomics library preparation, hash tag, and single-cell 3' sequencing

scRNA-seq experiments were performed by the Brigham and Women's Hospital Single Cell Genomics Core. Sorted viable human T cells were stained with a distinct barcoded antibody (Cell-Hashing antibody, TotalSeq-A; BioLegend), as previously described.<sup>58</sup> Next, 7,500 cells from each condition were resuspended in 0.4% BSA in PBS at a concentration of 1,000 cells per  $\mu$ L, pooled together, and then loaded onto a single lane (Chromium chip B, 10X Genomics) followed by encapsulation in a lipid droplet (Single Cell 3' kit V3, 10X Genomics) followed by cDNA and library generation according to the manufacturer's protocol. mRNA library was sequenced to an average of 50,000 reads per cell and hashtag-oligos (HTOs) (Cell Hashing antibodies) library sequenced to an average of 5,000 reads per cell, both using Illumina Novaseq. scRNA-seq reads of 14,446 cells were processed with Cell Ranger v3.1,<sup>59</sup> where read quantification was performed using the STAR aligner<sup>60</sup> against the GRCh38 transcriptome. There were 33,908 mean reads per cell, 21,577 genes were detected, and there were 4,855 median unique molecular identifier (UMI) counts per cell. Single-cell data analysis was performed using R version 4.0.3, and code is available from <https://github.com/aedin>.

### Demixing of HTO tags

Centering and log ratio transformation of the HTO tags (features) and centered log-ratio (CLR) transformation normalization of features performed using the `NormalizeData` in the Seurat R package (version 3.9.9.9). To assign the sample of origin for each cell, `HTODemux` with a positive quantile of 0.99 was applied to identify doublets ( $n = 2,654$ ) and negative ( $n = 1,037$ ) and assign cells to singlet HTO tags ( $n = 10,755$ ). Raw, unprocessed 14,446 HTO counts indicated that one hashtag (#7) had higher background raw counts compared with other HTO tags. The threshold used by `HTODemux` was greater for this hashtag than the other hashtag, reflecting its high background. This was not resolved by normalization or by increasing the `HTODemux` settings. Independent component analysis (using the R package `fastICA`) of the HTO data indicated that HTO tags that were called negative by `HTODemux` clustered with the cells assigned to this hashtag #7 ( $n = 191$ ). By curating these data, this HTO group was expanded to 436 putative cells. Clustering of cells to this hashtag was confirmed with mRNA clustering. Remaining cells with doublet or negative HTO tags were excluded. In the analysis of CD8 T cells in both UNT CD8 and UNT CD4/8 groups, we called CD8A counts  $>0$  as CD8<sup>+</sup> cells. There were 147 and 40 cells in each UNT group, in which there were 13 CD4<sup>+</sup> CD8A<sup>+</sup> cells from the 40 cells in UNT CD4/8 group.

### Removal of low-quality cells and normalization

The Bioconductor package, `scuttle`,<sup>61</sup> was used to extract cell-level metrics and to exclude low-quality cells: low log-total count or number of detected features or high percentage of mitochondrial genes to retain 8,459 cells.

### Dimension reduction and cluster analysis

Correspondence analysis was performed using the Corral Bioconductor package,<sup>62</sup> which visually had greater discrimination of groups (treatments and control) when compared with principal-component or independent-component analysis. Figures show t-SNE clustering of Corral reduced data with a seed of 945. t-SNE clustering was stable over a range of perplexity values 10, 100, and 500 (data not shown). To define cell clusters, a shared nearest neighbor graph<sup>63</sup> was constructed in which 50 nearest neighbors were considered during graph construction ( $k = 50$ ), and Louvain clustering with Jaccard distance was used to define cell clusters.

### MHC class II gene analysis

The expression of 16 MHC class II genes was examined (HLA-DRA, HLA-DRB5, HLA-DRB1, HLA-DQA1, HLA-DQB1, HLA-DQB1-AS1, HLA-DQA2, HLA-DQB2, HLA-DOB, HLA-DMB, HLA-DMA, HLA-DOA, HLA-DPA1, HLA-DPB1, CIITA, and CD74); however, seven genes were not expressed (HLA-DQB1-AS1, HLA-DQA2, HLA-DQB2, HLA-DOB, HLA-DMB, HLA-DOA, and CIITA), which was defined as expressed with a count of 5 or more in 10 or more cells (Figure S6). The group gene expression was compared using a pairwise Wilcoxon signed rank test, and a Kruskal-Wallis rank-sum test was applied to compute the overall statistic. Violin plots were generated using the `dittoSeq`<sup>64</sup> function `dittoPlotVarsAcrossGroups`.

### Differential expression gene analysis

DEG analysis was performed using a Poisson generalized linear model using the function `FindMarkers` in Seurat.<sup>65</sup> The `FindMarkers` `min.pct` parameter, which speeds up the function by testing fewer genes when the data have high dimension, was reduced from its default value of 0.1 to 0.05 in analyses where there were few cells (UNT analysis). *P* values were corrected for multiple testing based on Bonferroni correction using all genes in the matrix, and DEGs were ranked by *P* value. In DE analysis of UNT CD8 and CD4/CD8, genes were filtered to the top 10 and 40 DEGs (respectively), which had an absolute fold change of  $>0.7$  and adjusted  $p < 0.05$ .

### Pathway analysis

Pathway in analysis of Reactome gene sets was performed using the Bioconductor package `AUCell`,<sup>66</sup> which generates an “area under the curve” (AUC) score for each gene set that estimates the proportion of genes in the gene set that are highly expressed in each cell. Reactome pathways in the Bioconductor package “graphite” (version 1.38.0) were subset to the 2,390 *Homo sapiens* reactome pathways. `AUCell` “scored” each pathway in 6,949 cells, which included the BBζ ( $n = 2,100$ ), 28ζ ( $n = 2,280$ ), and 28BBζ ( $n = 2,569$ ). Default parameters for `AUCell` ranking were used, and the AUC scores represent the fraction of genes, within the top 1,677 genes in the ranking, that are included in the signature. The default `aucMaxRank` parameter of 5% of the total number of genes ( $n = 33,538$ ) was used as the threshold to calculate the AUC rankings. A pairwise Wilcoxon rank-sum test (`scran:pairwiseWilcox`) was used to test which Reactome pathways were differentially regulated between the three groups (BBζ, 28ζ, and 28BBζ). Pathways were filtered using both `scran:pairwiseWilcox` *P* values and the `scran:pairwiseWilcox` test statistic (which is called AUC and represents the probability of sampling a value in the first group greater than a random value from the second group). Figures report the `AUCell` AUC scores, not the `scran:pairwiseWilcox` test statistic.

### Accession codes

All generated scRNA-seq data are available at the Gene Expression Omnibus (GEO) with accession code GEO: GSE190964.

### Immunohistochemistry staining and quantitation

Tissues were fixed in 10% formalin (Sigma-Aldrich) for 24 h and replaced by 70% ethanol (Decon Laboratories) and then processed and embedded into blocks. Immunohistochemical staining was performed on 4-μm sections of the tissue slides on an automated Leica Bond Rx system, with antibody granzyme B (EPR20129-217, rabbit monoclonal; Abcam) at 1:250 for 60 min, PD-L1 (E1L3N, rabbit monoclonal; Cell Signaling Technology) at 1:200 for 60 min, and Ki67 (SP6, rabbit monoclonal; Biocare Medical) at 1:100 for 60 min. The sections were then treated according to the streptavidin-biotin-peroxidase complex method (Bond Polymer Refine Detection Kit; Leica Microsystems) with diaminobenzidine (DAB) as a chromogen and counterstained with hematoxylin.



Whole slide images were acquired from stained slides using a Vectra 3.0 Automated Quantitative Pathology Imaging System (Akoya Biosciences) and analyzed using Halo Image Analysis platform (Indica Labs).

### Statistical analysis

The statistical significance of the data was evaluated using ANOVA or Student's *t* test in GraphPad Prism 9.  $p < 0.05$  was considered significant. Student's *t* test: \* $p < 0.05$ ; \*\* $p < 0.01$ ; \*\*\* $p < 0.001$ ; and \*\*\*\* $p < 0.0001$ .

### SUPPLEMENTAL INFORMATION

Supplemental information can be found online at <https://doi.org/10.1016/j.omto.2021.12.019>.

### ACKNOWLEDGMENTS

This work was partially supported by the Kidney Cancer Research Alliance (KCCure) 2017 Research Grant Award (W.A.M.), National Foundation for Cancer Research fellowship (W.A.M.), and NCI P50CA101942 (G.J.F.). This work was also supported by the Assistant Secretary of Defense for Health Affairs endorsed by the Department of Defense, through the FY18, KCRP, Idea Development Award (W81XWH-18-1-0568), FY21 Translational Research Partnership Award (W81XWH-21-1-0442) and FY21 Idea Development Award (W81XWH-21-1-0482) to W.A.M. Opinions, interpretations, conclusions, and recommendations are those of the authors and are not necessarily endorsed by the Department of Defense. In addition, this work was supported by the Wong Family Award to Y.W.

### AUTHOR CONTRIBUTIONS

Y.W. and W.A.M. designed the study. Y.W., A.B., M.G., D.M.B., Z.Z., and M.L.O. performed experiments. Y.W., A.B., M.G., A.C.C., S.K., C.R., D.M.B., Q.-D.N., M.L.O., and Y.H. analyzed data. Y.W., A.B., G.J.F., and W.A.M. wrote the manuscript. All authors edited and approved the manuscript.

### DECLARATION OF INTERESTS

W.A.M. has patents in the PD-1/PDL1 field. G.J.F. has patents and pending royalties on the PD-1/PD-L1 pathway from Roche, Merck MSD, Bristol-Myers-Squibb, Merck KGA, Boehringer-Ingelheim, AstraZeneca, Dako, Leica, Mayo Clinic, Eli Lilly, and Novartis. G.J.F. has served on advisory boards for Roche, Bristol-Myers-Squibb, Xios, Origimed, Triursus, iTeos, NextPoint, IgM, Jubilant, Trillium, GV20, and Geode. G.J.F. has equity in Nextpoint, Triursus, Xios, iTeos, IgM, GV20, IOME, and Geode. The other authors declare no competing interests.

### REFERENCES

- Lee, D.W., Barrett, D.M., Mackall, C., Orentas, R., and Grupp, S.A. (2012). The future is now: chimeric antigen receptors as new targeted therapies for childhood cancer. *Clin. Cancer Res.* 18, 2780–2790. <https://doi.org/10.1158/1078-0432.Ccr-11-1920>.
- Srivastava, S., and Riddell, S.R. (2015). Engineering CAR-T cells: design concepts. *Trends Immunol.* 36, 494–502. <https://doi.org/10.1016/j.it.2015.06.004>.
- Maude, S.L., Frey, N., Shaw, P.A., Aplenc, R., Barrett, D.M., Bunin, N.J., Chew, A., Gonzalez, V.E., Zheng, Z., Lacey, S.F., et al. (2014). Chimeric antigen receptor T cells for sustained remissions in leukemia. *N. Engl. J. Med.* 371, 1507–1517. <https://doi.org/10.1056/NEJMoa1407222>.
- Zhu, Y., Tan, Y., Ou, R., Zhong, Q., Zheng, L., Du, Y., Zhang, Q., and Huang, J. (2016). Anti-CD19 chimeric antigen receptor-modified T cells for B-cell malignancies: a systematic review of efficacy and safety in clinical trials. *Eur. J. Haematol.* 96, 389–396. <https://doi.org/10.1111/ejh.12602>.
- Maude, S.L., Laetsch, T.W., Buechner, J., Rives, S., Boyer, M., Bittencourt, H., Bader, P., Veriner, M.R., Stefanski, H.E., Myers, G.D., et al. (2018). Tisagenlecleucel in children and young adults with B-cell lymphoblastic leukemia. *N. Engl. J. Med.* 378, 439–448. <https://doi.org/10.1056/NEJMoa1709866>.
- Schuster, S.J., Bishop, M.R., Tam, C.S., Waller, E.K., Borchmann, P., McGuirk, J.P., Jäger, U., Jaglowski, S., Andreadis, C., Westin, J.R., et al. (2019). Tisagenlecleucel in adult relapsed or refractory diffuse large B-cell lymphoma. *N. Engl. J. Med.* 380, 45–56. <https://doi.org/10.1056/NEJMoa1804980>.
- Neelapu, S.S., Locke, F.L., Bartlett, N.L., Lekakis, L.J., Miklos, D.B., Jacobson, C.A., Braunschweig, I., Oluwole, O.O., Siddiqi, T., Lin, Y., et al. (2017). Axicabtagene ciloleucel CAR T-cell therapy in refractory large B-cell lymphoma. *N. Engl. J. Med.* 377, 2531–2544. <https://doi.org/10.1056/NEJMoa1707447>.
- Locke, F.L., Ghobadi, A., Jacobson, C.A., Miklos, D.B., Lekakis, L.J., Oluwole, O.O., Lin, Y., Braunschweig, I., Hill, B.T., Timmerman, J.M., et al. (2019). Long-term safety and activity of axicabtagene ciloleucel in refractory large B-cell lymphoma (ZUMA-1): a single-arm, multicentre, phase 1–2 trial. *Lancet Oncol.* 20, 31–42. [https://doi.org/10.1016/s1470-2045\(18\)30864-7](https://doi.org/10.1016/s1470-2045(18)30864-7).
- Wang, M., Munoz, J., Goy, A., Locke, F.L., Jacobson, C.A., Hill, B.T., Timmerman, J.M., Holmes, H., Jaglowski, S., Flinn, I.W., et al. (2020). KTE-X19 CAR T-cell therapy in relapsed or refractory mantle-cell lymphoma. *N. Engl. J. Med.* 382, 1331–1342. <https://doi.org/10.1056/NEJMoa1914347>.
- Abramson, J.S., Palomba, M.L., Gordon, L.I., Lunning, M.A., Wang, M., Arnason, J., Mehta, A., Purev, E., Maloney, D.G., Andreadis, C., et al. (2020). Lisocabtagene maraleucel for patients with relapsed or refractory large B-cell lymphomas (TRANSCEND NHL 001): a multicentre seamless design study. *Lancet* 396, 839–852. [https://doi.org/10.1016/s0140-6736\(20\)31366-0](https://doi.org/10.1016/s0140-6736(20)31366-0).
- FDA (2021). FDA approves first cell-based gene therapy for adult patients with multiple myeloma. <https://www.fda.gov/news-events/press-announcements/fda-approves-first-cell-based-gene-therapy-adult-patients-multiple-myeloma>.
- Lindner, S.E., Johnson, S.M., Brown, C.E., and Wang, L.D. (2020). Chimeric antigen receptor signaling: functional consequences and design implications. *Sci. Adv.* 6, eaaz3223. <https://doi.org/10.1126/sciadv.aaz3223>.
- van der Stegen, S.J., Hamieh, M., and Sadelain, M. (2015). The pharmacology of second-generation chimeric antigen receptors. *Nat. Rev. Drug Discov.* 14, 499–509. <https://doi.org/10.1038/nrd4597>.
- Zhao, Z., Condomines, M., van der Stegen, S.J.C., Perna, F., Kloss, C.C., Gunset, G., Plotkin, J., and Sadelain, M. (2015). Structural design of engineered costimulation determines tumor rejection kinetics and persistence of CAR T cells. *Cancer Cell* 28, 415–428. <https://doi.org/10.1016/j.ccell.2015.09.004>.
- Pegram, H.J., Park, J.H., and Brentjens, R.J. (2014). CD28z CARs and armored CARs. *Cancer J.* 20, 127–133. <https://doi.org/10.1097/ppo.000000000000034>.
- Kalos, M., Levine, B.L., Porter, D.L., Katz, S., Grupp, S.A., Bagg, A., and June, C.H. (2011). T cells with chimeric antigen receptors have potent antitumor effects and can establish memory in patients with advanced leukemia. *Sci. Transl. Med.* 3, 95ra73. <https://doi.org/10.1126/scitranslmed.3002842>.
- Wang, D., Aguilar, B., Starr, R., Alizadeh, D., Brito, A., Sarkissian, A., Ostberg, J.R., Forman, S.J., and Brown, C.E. (2018). Glioblastoma-targeted CD4+ CAR T cells mediate superior antitumor activity. *JCI Insight* 3. <https://doi.org/10.1172/jci.insight.99048>.
- Yang, Y., Lin, T., Jacoby, E., Qin, H., Gardner, E.G., Chien, C.D., Lee, D.W., III, and Fry, T. (2015). J. CD4 CAR T cells mediate CD8-like cytotoxic anti-leukemic effects resulting in leukemic clearance and are less susceptible to attenuation by endogenous TCR activation than CD8 CAR T cells. *Blood* 126, 100. <https://doi.org/10.1182/blood.V126.23.100.100>.
- Turtle, C.J., Hanafi, L.A., Berger, C., Gooley, T.A., Cherian, S., Hudecek, M., Sommermeyer, D., Melville, K., Pender, B., Budiarto, T.M., et al. (2016). CD19

- CAR-T cells of defined CD4+:CD8+ composition in adult B cell ALL patients. *J. Clin. Invest.* 126, 2123–2138. <https://doi.org/10.1172/jci85309>.
20. Terakura, S., Yamamoto, T.N., Gardner, R.A., Turtle, C.J., Jensen, M.C., and Riddell, S.R. (2012). Generation of CD19-chimeric antigen receptor modified CD8+ T cells derived from virus-specific central memory T cells. *Blood* 119, 72–82. <https://doi.org/10.1182/blood-2011-07-366419>.
  21. Sheih, A., Voillet, V., Hanafi, L.A., DeBerg, H.A., Yajima, M., Hawkins, R., Gersuk, V., Riddell, S.R., Maloney, D.G., Wohlfahrt, M.E., et al. (2020). Clonal kinetics and single-cell transcriptional profiling of CAR-T cells in patients undergoing CD19 CAR-T immunotherapy. *Nat. Commun.* 11, 219. <https://doi.org/10.1038/s41467-019-13880-1>.
  22. Long, A.H., Haso, W.M., Shern, J.F., Wanhainen, K.M., Murgai, M., Ingaramo, M., Smith, J.P., Walker, A.J., Kohler, M.E., Venkateshwara, V.R., et al. (2015). 4-1BB costimulation ameliorates T cell exhaustion induced by tonic signaling of chimeric antigen receptors. *Nat. Med.* 21, 581–590. <https://doi.org/10.1038/nm.3838>.
  23. Boroughs, A.C., Larson, R.C., Marjanovic, N.D., Gosik, K., Castano, A.P., Porter, C.B.M., Lorrey, S.J., Ashenberg, O., Jerby, L., Hofree, M., et al. (2020). A distinct transcriptional program in human CAR T cells bearing the 4-1BB signaling domain revealed by scRNA-seq. *Mol. Ther.* 28, 2577–2592. <https://doi.org/10.1016/j.ymthe.2020.07.023>.
  24. Lo, A.S., Xu, C., Murakami, A., and Marasco, W.A. (2014). Regression of established renal cell carcinoma in nude mice using lentivirus-transduced human T cells expressing a human anti-CAIX chimeric antigen receptor. *Mol. Ther. Oncolytics* 1, 14003. <https://doi.org/10.1038/mt.2014.3>.
  25. Suarez, E.R., Chang de, K., Sun, J., Sui, J., Freeman, G.J., Signoretti, S., Zhu, Q., and Marasco, W.A. (2016). Chimeric antigen receptor T cells secreting anti-PD-L1 antibodies more effectively regress renal cell carcinoma in a humanized mouse model. *Oncotarget* 7, 34341–34355. <https://doi.org/10.18632/oncotarget.9114>.
  26. Shen, C., and Kaelin, W.G., Jr. (2013). The VHL/HIF axis in clear cell renal carcinoma. *Semin. Cancer Biol.* 23, 18–25. <https://doi.org/10.1016/j.semcancer.2012.06.001>.
  27. Ruf, M., Mittmann, C., Nowicka, A.M., Hartmann, A., Hermanns, T., Poyet, C., van den Broek, M., Sulser, T., Moch, H., and Schraml, P. (2015). pVHL/HIF-regulated CD70 expression is associated with infiltration of CD27+ lymphocytes and increased serum levels of soluble CD27 in clear cell renal cell carcinoma. *Clin. Cancer Res.* 21, 889–898. <https://doi.org/10.1158/1078-0432.Ccr-14-1425>.
  28. Wang, Y., Chan, L.L., Grimaud, M., Fayed, A., Zhu, Q., and Marasco, W.A. (2020). High-throughput image cytometry detection method for CAR-T transduction, cell proliferation, and cytotoxicity assays. *Cytometry A*. <https://doi.org/10.1002/cyto.a.24267>.
  29. Xu, C., Lo, A., Yammanuru, A., Tallarico, A.S.C., Brady, K., Murakami, A., Barteneva, N., Zhu, Q., and Marasco, W.A. (2010). Unique biological properties of catalytic domain directed human anti-CAIX antibodies discovered through phage-display technology. *PLoS One* 5, e9625. <https://doi.org/10.1371/journal.pone.0009625>.
  30. Huang, P., Zhou, Y., Liu, Z., and Zhang, P. (2016). Interaction between ANXA1 and GATA-3 in immunosuppression of CD4(+) T cells. *Mediators Inflamm.* 1701059. <https://doi.org/10.1155/2016/1701059>.
  31. Fergusson, J.R., Smith, K.E., Fleming, V.M., Rajoriya, N., Newell, E.W., Simmons, R., Marchi, E., Björkander, S., Kang, Y.H., Swadling, L., et al. (2014). CD161 defines a transcriptional and functional phenotype across distinct human T cell lineages. *Cell Rep.* 9, 1075–1088. <https://doi.org/10.1016/j.celrep.2014.09.045>.
  32. Bartkowiak, T., and Curran, M.A. (2015). 4-1BB agonists: multi-potent potentiators of tumor immunity. *Front. Oncol.* 117. <https://doi.org/10.3389/fonc.2015.00117>.
  33. Mishra, S., Srinivasan, S., Ma, C., and Zhang, N. (2021). CD8(+) regulatory T cell - a mystery to be revealed. *Front. Immunol.* 12, 708874. <https://doi.org/10.3389/fimmu.2021.708874>.
  34. Churlaud, G., Pitoiset, F., Jebbawi, F., Lorenzon, R., Bellier, B., Rosenzweig, M., and Klatzmann, D. (2015). Human and mouse CD8(+)/CD25(+)/FOXP3(+) regulatory T cells at steady state and during interleukin-2 therapy. *Front. Immunol.* 6, 171. <https://doi.org/10.3389/fimmu.2015.00171>.
  35. Lynn, R.C., Weber, E.W., Sotillo, E., Gennert, D., Xu, P., Good, Z., Anbunathan, H., Lattin, J., Jones, R., Tieu, V., et al. (2019). c-Jun overexpression in CAR T cells induces exhaustion resistance. *Nature* 576, 293–300. <https://doi.org/10.1038/s41586-019-1805-z>.
  36. Bohner, P., Chevalier, M.F., Cesson, V., Rodrigues-Dias, S.-C., Dartiguenave, F., Burrini, R., Tawadros, T., Valerio, M., Lucca, I., Nardelli-Haeffiger, D., et al. (2019). Double positive CD4+CD8+ T cells are enriched in urological cancers and favor T helper-2 polarization. *Front. Immunol.* 10. <https://doi.org/10.3389/fimmu.2019.00622>.
  37. Chen, L., and Flies, D.B. (2013). Molecular mechanisms of T cell co-stimulation and co-inhibition. *Nat. Rev. Immunol.* 13, 227–242. <https://doi.org/10.1038/nri3405>.
  38. Esensten, J.H., Helou, Y.A., Chopra, G., Weiss, A., and Bluestone, J.A. (2016). CD28 costimulation: from mechanism to therapy. *Immunity* 44, 973–988. <https://doi.org/10.1016/j.immuni.2016.04.020>.
  39. Zhang, H., Snyder, K.M., Suhoski, M.M., Maus, M.V., Kapoor, V., June, C.H., and Mackall, C.L. (2007). 4-1BB is superior to CD28 costimulation for generating CD8+ cytotoxic lymphocytes for adoptive immunotherapy. *J. Immunol.* 179, 4910–4918. <https://doi.org/10.4049/jimmunol.179.7.4910>.
  40. Lu, P., Lu, X.-A., Zhang, X., Xiong, M., Zhang, J., Zhou, X., Qi, F., Yang, J., and He, T. (2018). Which is better in CD19 CAR-T treatment of r/r B-ALL, CD28 or 4-1BB? A parallel trial under the same manufacturing process. *J. Clin. Oncol.* 36, 3041. [https://doi.org/10.1200/JCO.2018.36.15\\_suppl.3041](https://doi.org/10.1200/JCO.2018.36.15_suppl.3041).
  41. Ying, Z., He, T., Wang, X., Zheng, W., Lin, N., Tu, M., Xie, Y., Ping, L., Zhang, C., Liu, W., et al. (2019). Parallel comparison of 4-1BB or CD28 Co-stimulated CD19-targeted CAR-T cells for B cell non-hodgkin's lymphoma. *Mol. Ther. Oncolytics* 15, 60–68. <https://doi.org/10.1016/j.omto.2019.08.002>.
  42. Majzner, R.G., and Mackall, C.L. (2019). Clinical lessons learned from the first leg of the CAR T cell journey. *Nat. Med.* 25, 1341–1355. <https://doi.org/10.1038/s41591-019-0564-6>.
  43. Ramos, C.A., Rouce, R., Robertson, C.S., Reyna, A., Narala, N., Vyas, G., Mehta, B., Zhang, H., Dakhova, O., Carrum, G., et al. (2018). In vivo fate and activity of second-versus third-generation CD19-specific CAR-T cells in B cell non-hodgkin's lymphomas. *Mol. Ther.* 26, 2727–2737. <https://doi.org/10.1016/j.ymthe.2018.09.009>.
  44. Lee, D.W., Santomasso, B.D., Locke, F.L., Ghobadi, A., Turtle, C.J., Brudno, J.N., Maus, M.V., Park, J.H., Mead, E., Pavletic, S., et al. (2019). ASTCT consensus grading for cytokine release syndrome and neurologic toxicity associated with immune effector cells. *Biol. Blood Marrow Transpl.* 25, 625–638. <https://doi.org/10.1016/j.bbmt.2018.12.758>.
  45. Weinkove, R., George, P., Dasyam, N., and McLellan, A.D. (2019). Selecting costimulatory domains for chimeric antigen receptors: functional and clinical considerations. *Clin. Transl. Immunol.* 8, e1049. <https://doi.org/10.1002/cti.1049>.
  46. Philip, M., Fairchild, L., Sun, L., Horste, E.L., Camara, S., Shakiba, M., Scott, A.C., Viale, A., Lauer, P., Merghoub, T., et al. (2017). Chromatin states define tumour-specific T cell dysfunction and reprogramming. *Nature* 545, 452–456. <https://doi.org/10.1038/nature22367>.
  47. Saucillo, D.C., Gerriets, V.A., Sheng, J., Rathmell, J.C., and Maciver, N.J. (2014). Leptin metabolically licenses T cells for activation to link nutrition and immunity. *J. Immunol.* 192, 136–144. <https://doi.org/10.4049/jimmunol.1301158>.
  48. Nguyen, P., Okeke, E., Clay, M., Haydar, D., Justice, J., O'Reilly, C., Pruett-Miller, S., Papizan, J., Moore, J., Zhou, S., et al. (2020). Route of 41BB/41BBL costimulation determines effector function of B7-H3-CAR-CD28ζ T cells. *Mol. Ther. Oncolytics* 18, 202–214. <https://doi.org/10.1016/j.omto.2020.06.018>.
  49. Saraiva, D.P., Jacinto, A., Borralho, P., Braga, S., and Cabral, M.G. (2018). HLA-DR in cytotoxic T lymphocytes predicts breast cancer patients' response to neoadjuvant chemotherapy. *Front. Immunol.* 9, 2605. <https://doi.org/10.3389/fimmu.2018.02605>.
  50. Viillard, J.F., Blanco, P., André, M., Etienne, G., Liferman, F., Neau, D., Vidal, E., Moreau, J.F., and Pellegrin, J.L. (2006). CD8+HLA-DR+ T lymphocytes are increased in common variable immunodeficiency patients with impaired memory B-cell differentiation. *Clin. Immunol.* 119, 51–58. <https://doi.org/10.1016/j.clim.2005.11.011>.
  51. Baecher-Allan, C., Wolf, E., and Hafler, D.A. (2006). MHC class II expression identifies functionally distinct human regulatory T cells. *J. Immunol.* 176, 4622–4631. <https://doi.org/10.4049/jimmunol.176.8.4622>.
  52. Viillard, J.F., Bloch-Michel, C., Neau-Cransac, M., Taupin, J.L., Garrigue, S., Miossec, V., Mercie, P., Pellegrin, J.L., and Moreau, J.F. (2001). HLA-DR expression on lymphocyte subsets as a marker of disease activity in patients with systemic lupus

- erythematosus. *Clin. Exp. Immunol.* 125, 485–491. <https://doi.org/10.1046/j.1365-2249.2001.01623.x>.
53. Sáez-Ciri3n, A., Lacabartz, C., Lambotte, O., Versmisse, P., Urrutia, A., Boufassa, F., Barr3-Sinoussi, F., Delfraissy, J.F., Sinet, M., Pancino, G., et al. (2007). HIV controllers exhibit potent CD8 T cell capacity to suppress HIV infection ex vivo and peculiar cytotoxic T lymphocyte activation phenotype. *Proc. Natl. Acad. Sci. U S A* 104, 6776–6781. <https://doi.org/10.1073/pnas.0611244104>.
  54. Wunderlich, M., Chou, F.S., Link, K.A., Mizukawa, B., Perry, R.L., Carroll, M., and Mulloy, J.C. (2010). AML xenograft efficiency is significantly improved in NOD/SCID-IL2RG mice constitutively expressing human SCF, GM-CSF and IL-3. *Leukemia* 24, 1785–1788. <https://doi.org/10.1038/leu.2010.158>.
  55. Ito, M., Hiramatsu, H., Kobayashi, K., Suzue, K., Kawahata, M., Hioki, K., Ueyama, Y., Koyanagi, Y., Sugamura, K., Tsuji, K., et al. (2002). NOD/SCID/gamma(c)(null) mouse: an excellent recipient mouse model for engraftment of human cells. *Blood* 100, 3175–3182. <https://doi.org/10.1182/blood-2001-12-0207>.
  56. Shultz, L.D., Lyons, B.L., Burzenski, L.M., Gott, B., Chen, X., Chaleff, S., Kotb, M., Gillies, S.D., King, M., Mangada, J., et al. (2005). Human lymphoid and myeloid cell development in NOD/LtSz-scid IL2R gamma null mice engrafted with mobilized human hemopoietic stem cells. *J. Immunol.* 174, 6477–6489. <https://doi.org/10.4049/jimmunol.174.10.6477>.
  57. Boulch, M., Cazaux, M., Loe-Mie, Y., Thibaut, R., Corre, B., Lemaître, F., Grandjean, C.L., Garcia, Z., and Bouso, P. (2021). A cross-talk between CAR T cell subsets and the tumor microenvironment is essential for sustained cytotoxic activity. *Sci. Immunol.* 6. <https://doi.org/10.1126/sciimmunol.abd4344>.
  58. Stoeckius, M., Zheng, S., Houck-Loomis, B., Hao, S., Yeung, B.Z., Mauck, W.M., 3rd, Smibert, P., and Satija, R. (2018). Cell hashing with barcoded antibodies enables multiplexing and doublet detection for single cell genomics. *Genome Biol.* 19, 224. <https://doi.org/10.1186/s13059-018-1603-1>.
  59. Zheng, G.X., Terry, J.M., Belgrader, P., Ryvkin, P., Bent, Z.W., Wilson, R., Ziraldo, S.B., Wheeler, T.D., McDermott, G.P., Zhu, J., et al. (2017). Massively parallel digital transcriptional profiling of single cells. *Nat. Commun.* 8, 14049. <https://doi.org/10.1038/ncomms14049>.
  60. Dobin, A., Davis, C.A., Schlesinger, F., Drenkow, J., Zaleski, C., Jha, S., Batut, P., Chaisson, M., and Gingeras, T.R. (2013). STAR: ultrafast universal RNA-seq aligner. *Bioinformatics* 29, 15–21. <https://doi.org/10.1093/bioinformatics/bts635>.
  61. McCarthy, D.J., Campbell, K.R., Lun, A.T.L., and Wills, Q.F. (2017). Scater: pre-processing, quality control, normalization and visualization of single-cell RNA-seq data in R. *Bioinformatics* 33, 1179–1186. <https://doi.org/10.1093/bioinformatics/btw777>.
  62. Hsu, L.L., and Culhane, A.C. (2021). corral: single-cell RNA-seq dimension reduction, batch integration, and visualization with correspondence analysis. *bioRxiv*. <https://doi.org/10.1101/2021.11.24.469874>.
  63. Xu, C., and Su, Z. (2015). Identification of cell types from single-cell transcriptomes using a novel clustering method. *Bioinformatics* 31, 1974–1980. <https://doi.org/10.1093/bioinformatics/btv088>.
  64. Bunis, D.G., Andrews, J., Fragiadakis, G.K., Burt, T.D., and Sirota, M. (2020). dittoSeq: universal user-friendly single-cell and bulk RNA sequencing visualization toolkit. *Bioinformatics* 36, 5535–5536. <https://doi.org/10.1093/bioinformatics/btaa1011>.
  65. Stuart, T., Butler, A., Hoffman, P., Hafemeister, C., Papalexi, E., Mauck, W.M., 3rd, Hao, Y., Stoeckius, M., Smibert, P., and Satija, R. (2019). Comprehensive integration of single-cell data. *Cell* 177, 1888–1902.e21. <https://doi.org/10.1016/j.cell.2019.05.031>.
  66. Aibar, S., González-Blas, C.B., Moerman, T., Huynh-Thu, V.A., Imrichova, H., Hulselmans, G., Rambow, F., Marine, J.C., Geurts, P., Aerts, J., et al. (2017). SCENIC: single-cell regulatory network inference and clustering. *Nat. Methods* 14, 1083–1086. <https://doi.org/10.1038/nmeth.4463>.

**Supplemental information**

**Anti-CAIX BB $\zeta$  CAR4/8 T cells exhibit  
superior efficacy in a ccRCC mouse model**

**Yufei Wang, Alicia Buck, Marion Grimaud, Aedin C. Culhane, Sreekumar Kodangattil, Cecile Razimbaud, Dennis M. Bonal, Quang-De Nguyen, Zhu Zhu, Kevin Wei, Madison L. O'Donnell, Ying Huang, Sabina Signoretti, Toni K. Choueiri, Gordon J. Freeman, Quan Zhu, and Wayne A. Marasco**



## Supplementary Materials

### Supplemental Figures

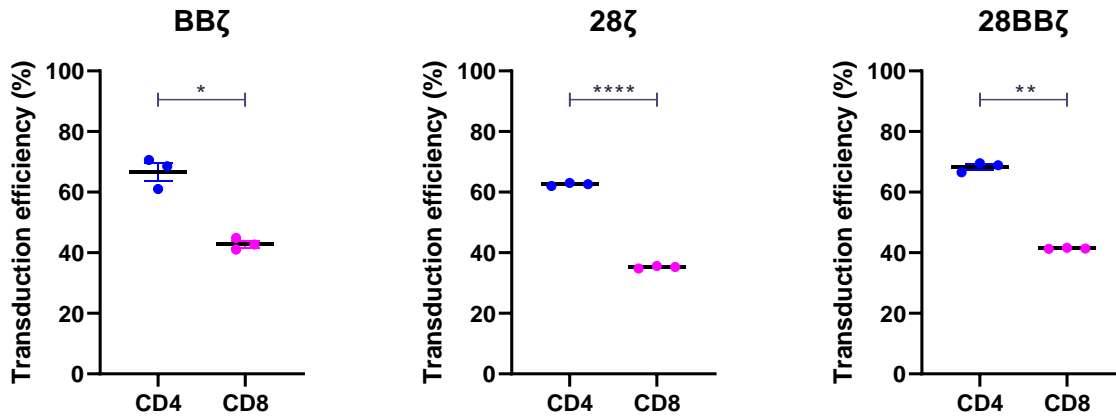

**Supplementary Figure 1. Transduction efficiency of CAR-T.** Transduction efficiency of CD4 (blue) and CD8 (pink) anti-CAIX BBζ, 28ζ, and 28BBζ CAR-T cells. ZsGreen expressing cells were quantified via flow cytometry and ZsGreen positivity was used to calculate transduction efficiency. *P* values are defined by unpaired two-tailed t-tests (\**p* < 0.05; \*\**p* < 0.01; \*\*\**p* < 0.001; and \*\*\*\**p* < 0.0001).

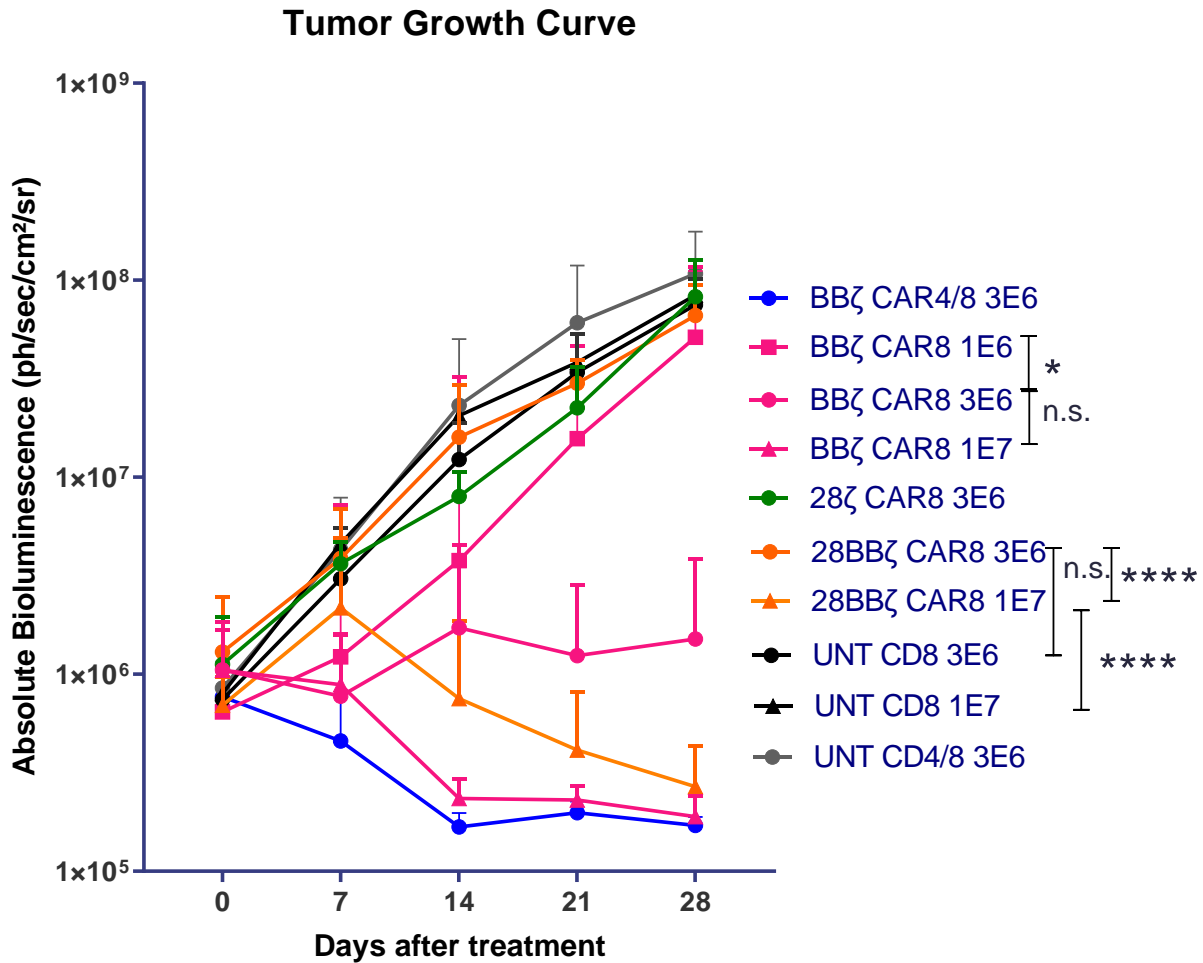

**Supplementary Figure 2. Tumor growth curve of mice treated with 1 million cells of anti-CAIX BBζ CAR8, 3 million cells of BBζ CAR8, 28ζ CAR8, 28BBζ CAR8, BBζ CAR4/8, UNT CD8 and CD4/8 cells, 10 million cells of BBζ CAR8, 28BBζ CAR8, and UNT CD8. BLI was performed on Day 0, 7, 14, 21 and 28 after CAR-T infusion. *P* values are defined by ANOVA (\**p* < 0.05; \*\**p* < 0.01; \*\*\**p* < 0.001; and \*\*\*\**p* < 0.0001).**

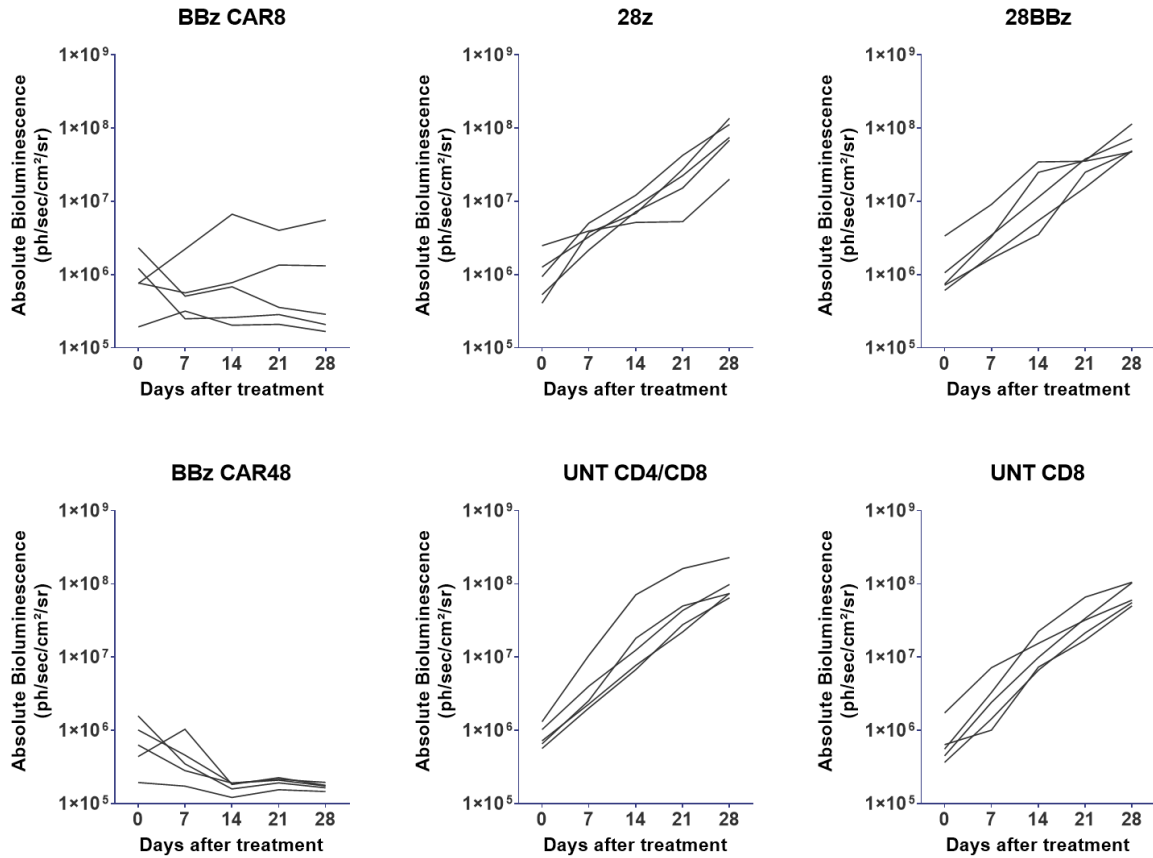

**Supplementary Figure 3. Tumor growth curve of each individual mouse treated with anti-CAIX BBζ, 28ζ, 28BBζ, BBζ CAR4/8, CD8 and CD48 UNT cells. BLI was performed on Day 0, 7, 14, 21 and 28 after CAR-T infusion.**

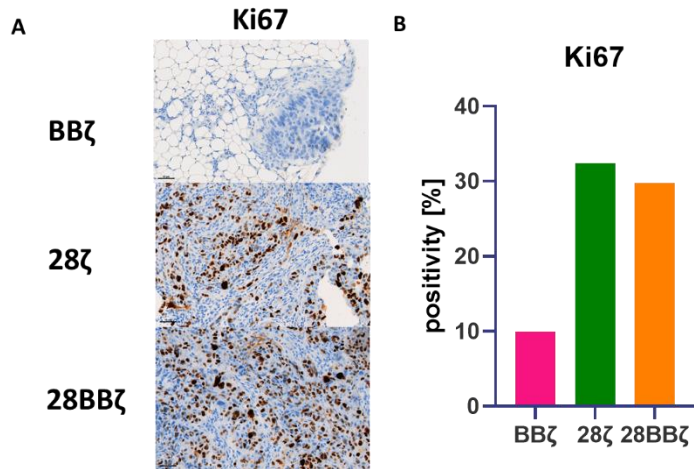

**Supplementary Figure 4. IHC analysis of tumors treated with CAR-T cells.** (A) Images of Ki67 staining on tumors treated with BBζ CAR8, 28ζ CAR8 and 28BBζ CAR8 cells (50x). (B) Quantification of Ki67+ tumor cells in tumors treated with BBζ CAR8 (pink), 28ζ CAR8 (green) and 28BBζ CAR8 (orange) cells.



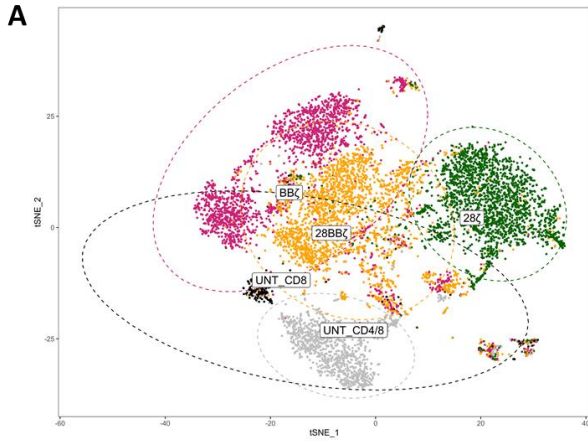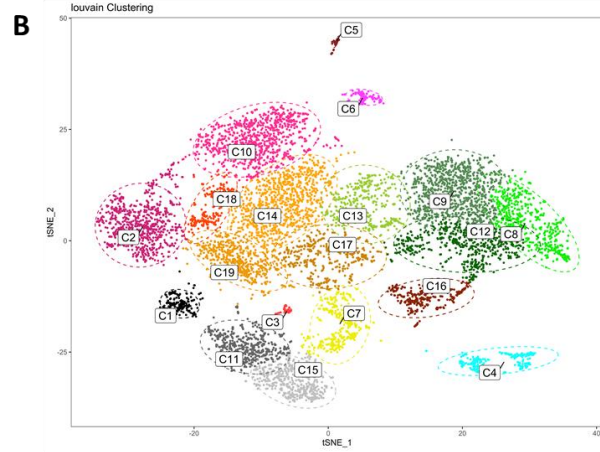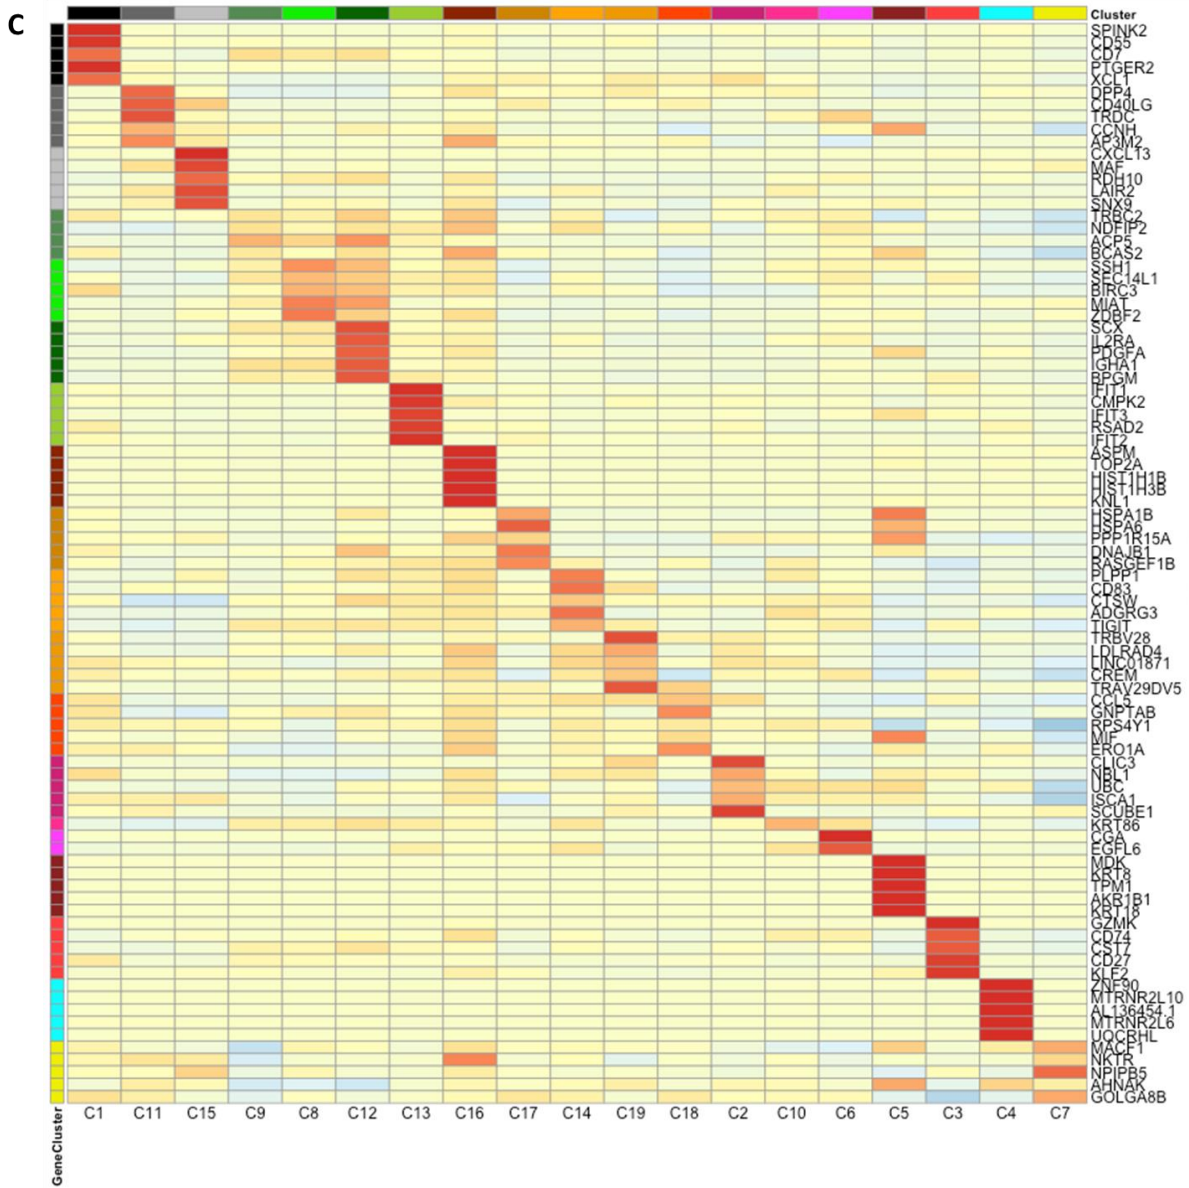

**Supplementary Figure 5. Transcriptional signatures of tumor infiltrating T cells.** (A) tSNE plot of tumor infiltrating T cells, colored by hashtag/ treatment group. This is same as Figure 4A and is shown here to have a better version when compare with panel B. (B) tSNE plot of tumor infiltrating T cells, colored by cluster assigned by Louvain clustering. 19 clusters were observed. (C) Top 5 differential expression genes ranked by *P* value from each cluster. The color bars on the top and side here reflect the color in the t-SNE plot.

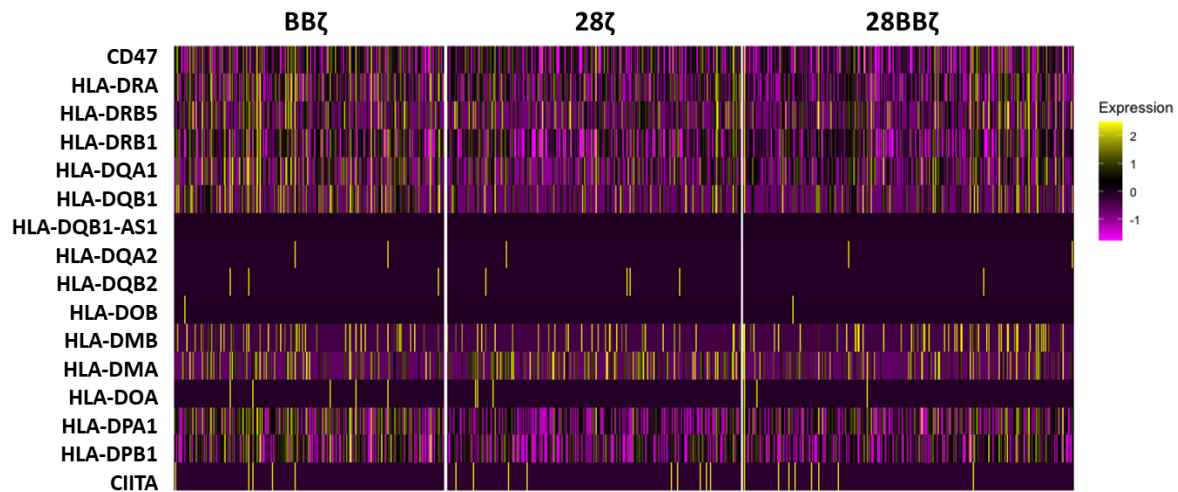

**Supplementary Figure 6. Heatmap of MHC II genes in BBζ CAR8, 28ζ CAR8, 28BB CAR8.**

Sixteen MHC II genes, CD74, HLA-DRA, HLA-DRB5, HLA-DRB1, HLA-DQA1, HLA-DQB1, HLA-DQB1-AS1, HLA-DQA2, HLA-DQB2, HLA-DOB, HLA-DMB, HLA-DMA, HLA-DOA, HLA-DPA1, HLA-DPB1, and CIITA were shown in the heatmap. Seven low expression genes HLA-DQB1-AS1, HLA-DQA2, HLA-DQB2, HLA-DOB, HLA-DMB, HLA-DOA, CIITA were removed in **Figure 5. C and D.**

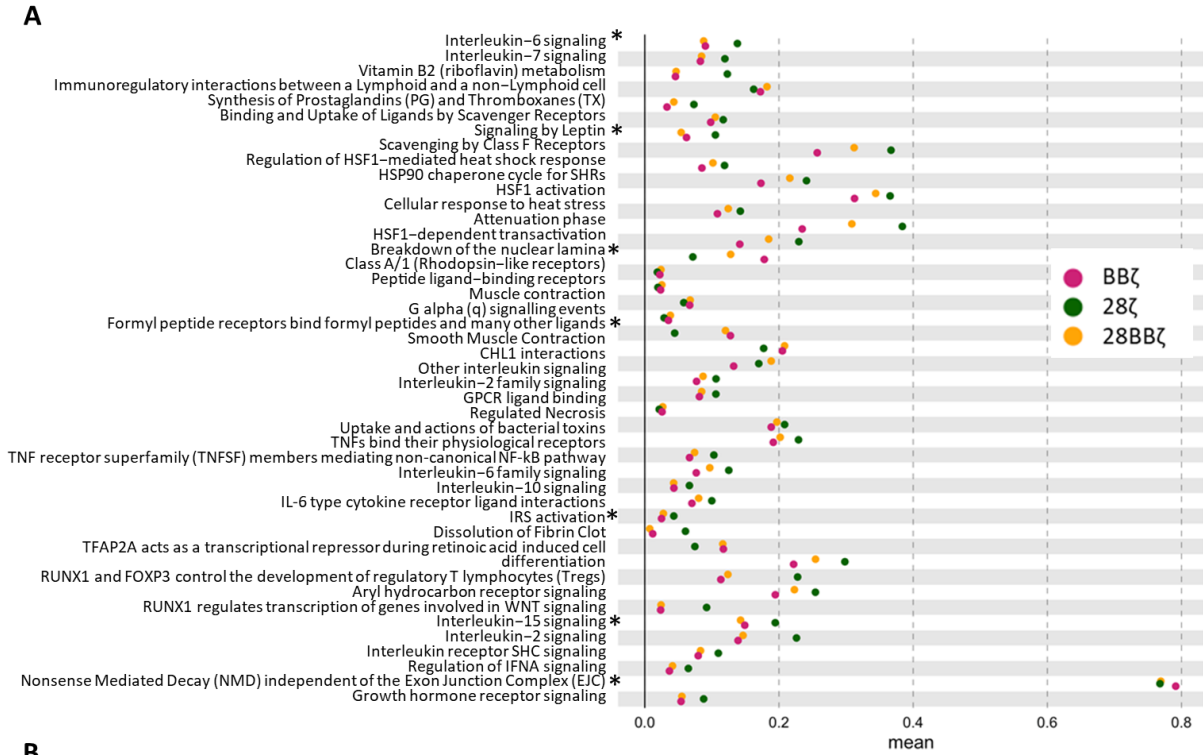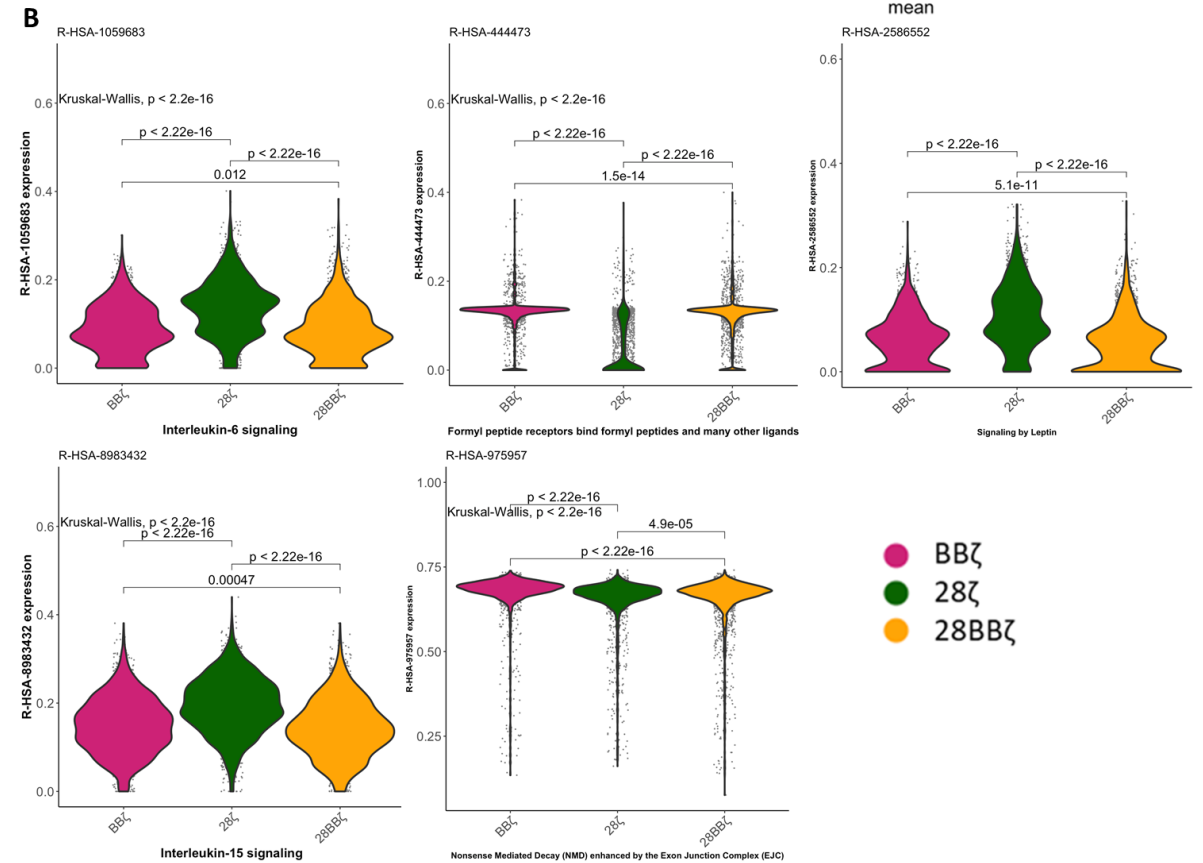



**Supplementary Figure 7. Pathway analysis of tumor infiltrating BB $\zeta$ , 28 $\zeta$ , and 28BB $\zeta$  CAR-T cells. (A) 44 pathways ranked by Reactome ID. See Table S4 for all *P* value results and Table S5 for all FDR results. 44 pathways were selected using *P* value <0.001 and PairwiseWilcox statistic >0.7 in each pairwise comparison. AUC values of BB $\zeta$  CAR8 (pink), 28 $\zeta$  CAR8 (green), 28BB $\zeta$  CAR8 (orange) in each pathway were shown in the plot. In seven pathways labeled with \*, the AUC value of BB $\zeta$  has a significant difference ( $p < 0.05$ ) compared to the value of 28BB $\zeta$ .**

**(B) Five pathways with significant difference in comparison of BB $\zeta$  and 28BB $\zeta$ .** AUC values of BB $\zeta$  CAR8 (pink), 28 $\zeta$  CAR8 (green), 28BB $\zeta$  CAR8 (orange) in each pathway (Interleukin-6 signaling, Formyl peptide receptors bind formyl peptides and many other ligands, Signaling by Leptin, Interleukin-15 signaling, and Nonsense Mediated Decay (NMD) independent of the Exon Junction Complex (EJC)) and corresponding *P* values of each pair comparison were shown in the plot.

### **Supplemental Tables**

See Excel files online for full Supplemental Tables.
